# Supplementary material for: MLPA and DNA index improve the molecular diagnosis of childhood B-cell acute lymphoblastic leukemia
Source: PubMed Central journal article supplement (PMC7359332; doi:10.1038/s41598-020-68311-9), 2020-07-13
Supplement: 41598_2020_68311_MOESM1_ESM.pdf [file 41598_2020_68311_MOESM1_ESM.pdf]

## Supplementary Information

### **MLPA and DNA index improve the molecular diagnosis of childhood B-cell acute lymphoblastic leukemia**

Chih-Hsiang Yu<sup>1</sup>, Tze-Kang Lin<sup>2,3</sup>, Shiann-Tarnng Jou<sup>4</sup>, Chien-Yu Lin<sup>5</sup>, Kai-Hsin Lin<sup>4</sup>, Meng-Yao Lu<sup>4</sup>,  
Shu-Huey Chen<sup>6</sup>, Chao-Neng Cheng<sup>7</sup>, Kang-Hsi Wu<sup>8</sup>, Shih-Chung Wang<sup>9</sup>, Hsiu-Hao Chang<sup>4</sup>, Meng-  
Ju Li<sup>4,10</sup>, Yu-Ling Ni<sup>11</sup>, Yi-Ning Su<sup>3</sup>, Dong-Tsamn Lin<sup>4,11</sup>, Hsuan-Yu Chen<sup>5</sup>, Christine J. Harrison<sup>12</sup>,  
Chia-Cheng Hung<sup>3\*</sup>, Shu-Wha Lin<sup>1\*</sup>, Yung-Li Yang<sup>4,11,13\*</sup>

<sup>1</sup>Departments of Clinical Laboratory Sciences and Medical Biotechnology, College of Medicine,  
National Taiwan University

<sup>2</sup>Graduate Institute of Clinical Medicine National Taiwan University, Taipei, Taiwan

<sup>3</sup>Sofiva Genomics Co., Ltd., Taipei, Taiwan

<sup>4</sup>Department of Pediatrics, National Taiwan University Hospital and National Taiwan University  
College of Medicine, Taipei, Taiwan

<sup>5</sup>Institute of Statistical Science Academia Sinica, Taipei, Taiwan

<sup>6</sup>Department of Pediatrics, Taipei Medical University–Shuang Ho Hospital, Taipei, Taiwan;

<sup>7</sup>Department of Pediatrics, National Cheng Kung University Hospital, Tainan, Taiwan

<sup>8</sup>Division of Pediatric Hematology & Oncology, China Medical University Children's Hospital,  
Taichung, Taiwan

<sup>9</sup>Department of Pediatrics, Changhua Christian Hospital, Changhua, Taiwan

<sup>10</sup>Department of Pediatrics, National Taiwan University Hospital Hsin-Chu Branch, Hsinchu, Taiwan

<sup>11</sup>Department of Laboratory Medicine, National Taiwan University Hospital, Taipei, Taiwan

<sup>12</sup>Leukaemia Research Cytogenetics Group, Northern Institute for Cancer Research, Newcastle University, Newcastle-upon-Tyne, United Kingdom

<sup>13</sup> Department of Laboratory Medicine, College of Medicine, National Taiwan University, Taipei, Taiwan

**\*Corresponding Authors**

Yung-Li Yang, Department of Laboratory Medicine, National Taiwan University Hospital and National Taiwan University College of Medicine, Taipei, Taiwan, 100, No 7. Chung-Shan South Road, ([yangyl92@ntu.edu.tw](mailto:yangyl92@ntu.edu.tw)), tel: +886-2-23123456-71712, fax: +886-2-23224263

Shu-Wha Lin, Departments of Clinical Laboratory Sciences and Medical Biotechnology, College of Medicine, National Taiwan University, Taipei, Taiwan, 100, No 7. Chung-Shan South Road, ([mtshuwaha@ntu.edu.tw](mailto:mtshuwaha@ntu.edu.tw)), tel: +886-2-23123456-71712, fax: +886-2-23224263

Chia-Cheng Hung, Sofiva Genomics Co., Ltd., Taipei, Taiwan, No27, Baoqing Rd, Taipei, ([double@sofivagenomics.com.tw](mailto:double@sofivagenomics.com.tw)), Taiwan, 100, tel: +886-2-23826615, fax: +886-2-23826617

## **Supplementary materials and methods**

### **Supplemental references**

**Supplementary Table S1. Primer sequences**

**Supplementary Table S2. Distribution of CNA in each major B-ALL subtypes.**

**Supplementary Table S3. Detailed subtype, karyotype, MLPA P036 and DNA index results of B-ALL in this study.**

**Supplementary Table S4. STR profiling of masked hypodiploidy and high hyperdiploidy B-ALL cases.**

**Supplementary Table S5. 5-year EFS and OS using univariate and multivariate survival analysis.**

**Supplementary Figure S1. Flow diagram of analysis through this study.**

**Supplementary Figure S2. Analysis of high hyperdiploidy cases.**

**Supplementary Figure S3. The MLPA P327 of iAMP21-ALL.**

**Supplementary Figure S4. The results of CytoScan HD (Pt689) or 750K (Pt813) array.**

**Supplementary Figure S5. STR profiling for masked hypodiploidy.**

**Supplementary Figure S6. Flowchart for distinguishing masked hypodiploidy from high hyperdiploidy.**

**Supplementary Figure S7. Analysis of a case with *TCF3-ZNF384* case.**

## Supplementary materials and methods

### Protocols

Patients were prospectively assigned to one of three risk groups (standard, high, and very high) based on their presenting clinical features and biology of the leukemic cells on the TPOG-ALL-2002 protocol. Patients were considered to have standard-risk (SR) ALL if they were between 1 and 9 years of age presenting with a leukocyte count of less than  $10 \times 10^9$  cells/L, or were between 2 and 7 years of age presenting with a leukocyte count between  $10 \times 10^9$  and  $50 \times 10^9$  cells/L. Patients were considered to have high-risk ALL if they were between 1 and 9 years of age presenting with a leukocyte count between  $50 \times 10^9$  and  $100 \times 10^9$  cells/L, or between 1 and 2 or 7 and 10 years of age presenting with a leukocyte count between  $10 \times 10^9$  and  $50 \times 10^9$  cells/L. In addition, those with CNS leukemia or cranial nerve palsy at diagnosis, and those with central nervous system leukemia (cerebrospinal fluid white blood cells with blasts), cranial nerve palsy, testicular leukemia, or B-ALL with *TCF3-PBX1* fusion were also considered to be at high risk. Patients with at least one of the following were assigned to the very high-risk (VHR) group: age below 1 year, initial leukocyte count greater than  $100 \times 10^9$  cells/L, lymphoblastic lymphoma with more than 25% lymphoblasts in the bone marrow, hypodiploidy, HR patients with poor treatment response, and the presence of *BCR-ABL1*, *KMT2A-AF4*, or other *KMT2A* rearrangements in B-ALL. The induction chemotherapy consisted of vincristine, epirubicin, prednisolone, L-asparaginase, cytarabine, cyclophosphamide, 6-mercaptopurine based upon the risk groups. Consolidation were used high dose methotrexate and 6-mercaptopurine. The drugs used in continuation phase including vincristine and dexamethasone, methotrexate, 6-mercaptopurine,

cytarabine, cyclophosphamide and etoposide depended upon the risk group. The details of drug administration were published elsewhere<sup>1,2</sup>.

The risk classification system of TPOG-ALL-2013 is slightly different from that of 2002. B-lymphoblastic ALL with DNA index  $\geq 1.16$  [or hyperdiploidy (51-68)], *ETV6-RUNX1* fusion, or age 1 to 9.9 years and presenting WBC  $< 50,000/\text{mm}^3$  and not have very high risk genetic alterations, poor early response. Patients with standard-risk included *ETV6-RUNX1* and hyperdiploidy. Criteria of very high-risk patients included *BCR-ABL1*, infant ALL, induction failure or  $\geq 1\%$  leukemic lymphoblasts in the bone marrow on remission date (with the exception of hyperdiploid (51-68) and *ETV6-RUNX1* cases who should have positive MRD after consolidation therapy),  $\geq 0.1\%$  leukemic lymphoblasts in the bone marrow in week 7 of continuation treatment. Other patients were classified as high-risk. The induction chemotherapy was similar to that of 2002, but adjusted by Day 15 MRD. High dose methotrexate and 6-mercaptopurine were used in the consolidation phase. The drugs used in continuation phase including vincristine and dexamethasone, methotrexate, 6-mercaptopurine, cytarabine, cyclophosphamide depended upon the risk group. Etoposide was no longer used in 2013 protocol.

### **Routine RT-PCR for common fusion gene**

RNA obtained from BM or PB samples was isolated using standard methods.<sup>3</sup> Complement DNA (cDNA) was synthesized using Maxima First Strand cDNA Synthesis Kit (Thermo Fisher Scientific, Waltham, MA, USA). 1  $\mu\text{g}$  total RNA was used for cDNA synthesis according to the manufacturer's

instructions. The prepared reaction mix was incubated for 10 minutes at 25°C, followed by 30 minutes at 60°C, then the reaction was terminated by heating at 85°C for 5 minutes. For common fusion genes (*ETV6-RUNX1*, *KMT2A-AFF1*, *BCR-ABL1*, *TCF3-PBX1* and *P2RY8-CRLF2*) detection, MyTaq HS Mix (Bioline, London, United Kingdom) was used. Primers for RT-PCR used in this study are listed in Table S1. Thermocycling for PCR was performed: 98°C for 30 seconds, then 38 cycles of 98°C for 30 seconds, 60°C for 30 seconds and 72°C for 30 seconds, followed by final extension at 72°C for 5 minutes.

### **Short tandem repeat (STR) profiling**

Amelogenin and autosomal STR profiles were analyzed using VeriFiler Direct/Identifiler Direct Paternity Testing Bundle (Thermo Fisher Scientific, Waltham, MA, USA) according to the manufacturer protocol. Fragment analysis was carried on ABI 3730XL DNA Analyzer and automated profiling was performed using GeneMapper software 5 (Applied Biosystems, Waltham, MA, USA).

### **SNP arrays**

The tumor DNA was used to detect chromosomal alterations by SNP array. Microarrays were performed using the CytoScan HD or 750K array kit (Affymetrix, Inc, Santa Clara, CA), according to the manufacturers' protocols and data were analyzed using Chromosome Analysis Suite (Affymetrix, Inc, Santa Clara, CA)

## **Transcriptome sequencing and bioinformatic analysis**

After 2017, some newly or relapsed samples were submitted for RNA-seq analysis. RNA-seq was performed using TruSeq library preparation and HiSeq 2000 sequencer (Illumina, San Diego, CA, USA). All sequence reads were paired-end, and were performed by using total RNA-seq (100-base pair (bp) reads). All software was run using default parameters on a high-performance computing environment, and fastq files were mapped to the GRCh37 human genome reference by STAR v2.5.3a<sup>4</sup>. Gene annotation downloaded from the Ensembl website (<http://www.ensembl.org/>) was used for STAR mapping and the following read-count evaluation. FusionCatcher<sup>5</sup> were used to detect fusions, and all the reported rearrangements were manually reviewed and candidate fusion genes were validated by RT-PCR.

## Supplemental references

1. Li M-J, Liu H-C, Yen H-J, et al: Treatment for childhood acute lymphoblastic leukemia in Taiwan: Taiwan Pediatric Oncology Group ALL-2002 study emphasizing optimal reinduction therapy and central nervous system preventive therapy without cranial radiation. *Pediatric Blood & Cancer*. **64**, 234-241 (2017).
2. Liang DC, Yang CP, Lin DT, et al: Long-term results of Taiwan Pediatric Oncology Group studies 1997 and 2002 for childhood acute lymphoblastic leukemia. *Leukemia*. **24**, 397-405 (2010).
3. Yang YL, Lin SR, Chen JS, et al: Multiplex reverse transcription-polymerase chain reaction as diagnostic molecular screening of 4 common fusion chimeric genes in Taiwanese children with acute lymphoblastic leukemia. *J Pediatr Hematol Oncol*. **32**, e323-30 (2010).
4. Dobin A, Davis CA, Schlesinger F, et al: STAR: ultrafast universal RNA-seq aligner. *Bioinformatics*. **29**, 15-21 (2012).
5. Nicorici D, Şatalan M, Edgren H, et al: FusionCatcher – a tool for finding somatic fusion genes in paired-end RNA-sequencing data. *bioRxiv*. 011650 (2014).



**Supplementary Table S1. Primer sequences**

| <b>Fusion gene</b> | <b>PCR primer (5' to 3')</b>                                           |
|--------------------|------------------------------------------------------------------------|
| <i>ETV6-RUNX1</i>  | Forward: CGTGGATTTCAAACAGTCCA<br>Reverse: CATTGCCAGCCATCACAGTGAC       |
| <i>KMT2A-AFF1</i>  | Forward: AAAGCAGCCTCCACCACC<br>Reverse: GGTTACAGAACTGACATGCTG          |
| <i>BCR-ABL1</i>    | Forward: CGGTTGTCGTGTCCGAGG<br>Reverse: AGATACTCAGCGGCATTG             |
| <i>TCF3- PBX1</i>  | Forward: CAGCCTCATGCACAACCAC<br>Reverse: TAACTCCTCTTTGGCTTCCTC         |
| <i>P2RY8-CRLF2</i> | Forward: GCGGCCGCCTTTGCAAGGTTGC<br>Reverse: GTGTCCATCACAAACGCCACGTAGGA |

**Supplementary Table S2. Distribution of CNA in each major B-ALL subtypes.**

|                                                  | Total      |             | Hyperdiploidy |             | Hypodiploidy |             | iAMP21   |             | ETV6-RUNX1 |             | TCF3-PBX1 |             | KMT2A-r   |             | Ph+/Ph-like |             | TCF3-HLF |             | ZNF384/362-r |             | MEF2D-r  |             | Other     |             |
|--------------------------------------------------|------------|-------------|---------------|-------------|--------------|-------------|----------|-------------|------------|-------------|-----------|-------------|-----------|-------------|-------------|-------------|----------|-------------|--------------|-------------|----------|-------------|-----------|-------------|
|                                                  | N          | %           | N             | %           | N            | %           | N        | %           | N          | %           | N         | %           | N         | %           | N           | %           | N        | %           | N            | %           | N        | %           | N         | %           |
| <b>Cases</b>                                     | <b>233</b> | <b>100</b>  | <b>59</b>     | <b>100</b>  | <b>7</b>     | <b>100</b>  | <b>4</b> | <b>100</b>  | <b>36</b>  | <b>100</b>  | <b>12</b> | <b>100</b>  | <b>14</b> | <b>100</b>  | <b>16</b>   | <b>100</b>  | <b>2</b> | <b>100</b>  | <b>9</b>     | <b>100</b>  | <b>3</b> | <b>100</b>  | <b>71</b> | <b>100</b>  |
| ≥ 1 alterations                                  | 153        | 65.7        | 16            | 27.1        | 7            | 100         | 3        | 75.0        | 34         | 94.4        | 4         | 33.3        | 6         | 42.9        | 16          | 100         | 1        | 50.0        | 9            | 100         | 1        | 33.3        | 56        | 78.9        |
| Without alterations                              | 80         | 34.3        | 43            | 72.9        | 0            | 0           | 1        | 25.0        | 2          | 5.56        | 8         | 66.7        | 8         | 57.1        | 0           | 0           | 1        | 50.0        | 0            | 0           | 2        | 66.7        | 15        | 21.1        |
| <b>CDKN2A</b>                                    | <b>70</b>  | <b>30.5</b> | <b>7</b>      | <b>11.9</b> | <b>5</b>     | <b>71.4</b> | <b>1</b> | <b>25.0</b> | <b>8</b>   | <b>22.2</b> | <b>3</b>  | <b>25.0</b> | <b>2</b>  | <b>14.3</b> | <b>7</b>    | <b>43.8</b> | <b>1</b> | <b>50.0</b> | <b>3</b>     | <b>33.3</b> | <b>1</b> | <b>33.3</b> | <b>32</b> | <b>45.1</b> |
| Heterozygous deletion                            | 28         | 12.4        | 5             | 8.5         | 2            | 28.6        | 0        | 0.0         | 2          | 5.6         | 2         | 16.7        | 0         | 0.0         | 1           | 6.3         | 0        | 0.0         | 3            | 33.3        | 1        | 33.3        | 12        | 16.9        |
| Homozygous deletion                              | 42         | 18.0        | 2             | 3.4         | 3            | 42.9        | 1        | 25.0        | 6          | 16.7        | 1         | 8.3         | 2         | 14.3        | 6           | 37.5        | 1        | 50.0        | 0            | 0.0         | 0        | 0.0         | 20        | 28.2        |
| <b>CDKN2B</b>                                    | <b>68</b>  | <b>29.6</b> | <b>6</b>      | <b>10.2</b> | <b>5</b>     | <b>71.4</b> | <b>1</b> | <b>25.0</b> | <b>8</b>   | <b>22.2</b> | <b>3</b>  | <b>25.0</b> | <b>2</b>  | <b>14.3</b> | <b>7</b>    | <b>43.8</b> | <b>1</b> | <b>50.0</b> | <b>3</b>     | <b>33.3</b> | <b>1</b> | <b>33.3</b> | <b>31</b> | <b>43.7</b> |
| Heterozygous deletion                            | 27         | 12.0        | 5             | 8.5         | 2            | 28.6        | 1        | 25.0        | 2          | 5.6         | 2         | 16.7        | 1         | 7.1         | 1           | 6.3         | 0        | 0.0         | 2            | 22.2        | 1        | 33.3        | 10        | 14.1        |
| Homozygous deletion                              | 41         | 17.6        | 1             | 1.7         | 3            | 42.9        | 0        | 0.0         | 6          | 16.7        | 1         | 8.3         | 1         | 7.1         | 6           | 37.5        | 1        | 50.0        | 1            | 11.1        | 0        | 0.0         | 21        | 29.6        |
| <b>PAX5</b>                                      | <b>59</b>  | <b>25.8</b> | <b>2</b>      | <b>3.4</b>  | <b>6</b>     | <b>85.7</b> | <b>1</b> | <b>25.0</b> | <b>13</b>  | <b>36.1</b> | <b>4</b>  | <b>33.3</b> | <b>4</b>  | <b>28.6</b> | <b>6</b>    | <b>37.5</b> | <b>1</b> | <b>50.0</b> | <b>2</b>     | <b>22.2</b> | <b>0</b> | <b>0.0</b>  | <b>20</b> | <b>28.2</b> |
| Heterozygous deletion                            | 51         | 22.3        | 2             | 3.4         | 6            | 85.7        | 1        | 25.0        | 13         | 36.1        | 4         | 33.3        | 3         | 21.4        | 4           | 25.0        | 1        | 50.0        | 2            | 22.2        | 0        | 0.0         | 15        | 21.1        |
| Homozygous deletion                              | 1          | 0.4         | 0             | 0.0         | 0            | 0.0         | 0        | 0.0         | 0          | 0.0         | 0         | 0.0         | 1         | 7.1         | 0           | 0.0         | 0        | 0.0         | 0            | 0.0         | 0        | 0.0         | 0         | 0.0         |
| Exon 1-6 amplification and Heterozygous deletion | 1          | 0.4         | 0             | 0.0         | 0            | 0.0         | 0        | 0.0         | 0          | 0.0         | 0         | 0.0         | 0         | 0.0         | 0           | 0.0         | 0        | 0.0         | 0            | 0.0         | 0        | 0.0         | 1         | 1.4         |
| Exon 2-5 amplification                           | 5          | 2.1         | 0             | 0.0         | 0            | 0.0         | 0        | 0.0         | 0          | 0.0         | 0         | 0.0         | 0         | 0.0         | 2           | 12.5        | 0        | 0.0         | 0            | 0.0         | 0        | 0.0         | 3         | 4.2         |
| Exon 8-10 duplication                            | 1          | 0.4         | 0             | 0.0         | 0            | 0.0         | 0        | 0.0         | 0          | 0.0         | 0         | 0.0         | 0         | 0.0         | 0           | 0.0         | 0        | 0.0         | 0            | 0.0         | 0        | 0.0         | 1         | 1.4         |
| <b>ETV6</b>                                      | <b>46</b>  | <b>20.2</b> | <b>5</b>      | <b>8.5</b>  | <b>5</b>     | <b>71.4</b> | <b>0</b> | <b>0.0</b>  | <b>25</b>  | <b>69.4</b> | <b>0</b>  | <b>0.0</b>  | <b>0</b>  | <b>0.0</b>  | <b>1</b>    | <b>6.3</b>  | <b>0</b> | <b>0.0</b>  | <b>5</b>     | <b>55.6</b> | <b>0</b> | <b>0.0</b>  | <b>5</b>  | <b>7.0</b>  |
| Heterozygous deletion                            | 42         | 18.5        | 5             | 8.5         | 5            | 71.4        | 0        | 0.0         | 22         | 61.1        | 0         | 0.0         | 0         | 0.0         | 1           | 6.3         | 0        | 0.0         | 4            | 44.4        | 0        | 0.0         | 5         | 7.0         |
| Homozygous deletion                              | 4          | 1.7         | 0             | 0.0         | 0            | 0.0         | 0        | 0.0         | 3          | 8.3         | 0         | 0.0         | 0         | 0.0         | 0           | 0.0         | 0        | 0.0         | 1            | 11.1        | 0        | 0.0         | 0         | 0.0         |
| <b>IKZF1</b>                                     | <b>46</b>  | <b>20.2</b> | <b>6</b>      | <b>10.2</b> | <b>6</b>     | <b>85.7</b> | <b>0</b> | <b>0.0</b>  | <b>3</b>   | <b>8.3</b>  | <b>0</b>  | <b>0.0</b>  | <b>0</b>  | <b>0.0</b>  | <b>11</b>   | <b>68.8</b> | <b>0</b> | <b>0.0</b>  | <b>1</b>     | <b>11.1</b> | <b>0</b> | <b>0.0</b>  | <b>19</b> | <b>26.8</b> |
| Heterozygous deletion                            | 42         | 18.5        | 6             | 10.2        | 5            | 71.4        | 0        | 0.0         | 3          | 8.3         | 0         | 0.0         | 0         | 0.0         | 9           | 56.3        | 0        | 0.0         | 1            | 11.1        | 0        | 0.0         | 18        | 25.4        |
| Homozygous deletion                              | 4          | 1.7         | 0             | 0.0         | 1            | 14.3        | 0        | 0.0         | 0          | 0.0         | 0         | 0.0         | 0         | 0.0         | 2           | 12.5        | 0        | 0.0         | 0            | 0.0         | 0        | 0.0         | 1         | 1.4         |
| <b>IKZF1<sup>plus</sup></b>                      | <b>22</b>  | <b>9.9</b>  | <b>2</b>      | <b>3.4</b>  | <b>4</b>     | <b>57.1</b> | <b>0</b> | <b>0.0</b>  | <b>1</b>   | <b>2.8</b>  | <b>0</b>  | <b>0.0</b>  | <b>0</b>  | <b>0.0</b>  | <b>4</b>    | <b>25.0</b> | <b>0</b> | <b>0.0</b>  | <b>1</b>     | <b>11.1</b> | <b>0</b> | <b>0.0</b>  | <b>10</b> | <b>14.1</b> |
| <b>RBI</b>                                       | <b>29</b>  | <b>12.4</b> | <b>3</b>      | <b>5.1</b>  | <b>6</b>     | <b>85.7</b> | <b>1</b> | <b>25.0</b> | <b>2</b>   | <b>5.6</b>  | <b>0</b>  | <b>0.0</b>  | <b>2</b>  | <b>14.3</b> | <b>3</b>    | <b>18.8</b> | <b>0</b> | <b>0.0</b>  | <b>1</b>     | <b>11.1</b> | <b>0</b> | <b>0.0</b>  | <b>11</b> | <b>15.5</b> |
| Heterozygous deletion                            | 23         | 9.9         | 2             | 3.4         | 5            | 71.4        | 0        | 0.0         | 2          | 5.6         | 0         | 0.0         | 1         | 7.1         | 2           | 12.5        | 0        | 0.0         | 0            | 0.0         | 0        | 0.0         | 11        | 15.5        |
| Homozygous deletion                              | 5          | 2.1         | 1             | 1.7         | 1            | 14.3        | 1        | 25.0        | 0          | 0.0         | 0         | 0.0         | 0         | 0.0         | 1           | 6.3         | 0        | 0.0         | 1            | 11.1        | 0        | 0.0         | 0         | 0.0         |
| Duplication                                      | 1          | 0.4         | 0             | 0.0         | 0            | 0.0         | 0        | 0.0         | 0          | 0.0         | 0         | 0.0         | 1         | 7.1         | 0           | 0.0         | 0        | 0.0         | 0            | 0.0         | 0        | 0.0         | 0         | 0.0         |
| <b>BTG1</b>                                      | <b>22</b>  | <b>9.4</b>  | <b>1</b>      | <b>1.7</b>  | <b>5</b>     | <b>71.4</b> | <b>1</b> | <b>25.0</b> | <b>2</b>   | <b>5.6</b>  | <b>1</b>  | <b>8.3</b>  | <b>1</b>  | <b>7.1</b>  | <b>6</b>    | <b>37.5</b> | <b>0</b> | <b>0.0</b>  | <b>1</b>     | <b>11.1</b> | <b>0</b> | <b>0.0</b>  | <b>4</b>  | <b>5.6</b>  |
| Heterozygous deletion                            | 19         | 8.2         | 0             | 0.0         | 5            | 71.4        | 1        | 25.0        | 2          | 5.6         | 1         | 8.3         | 0         | 0.0         | 5           | 31.3        | 0        | 0.0         | 1            | 11.1        | 0        | 0.0         | 4         | 5.6         |
| Homozygous deletion                              | 1          | 0.9         | 0             | 0.0         | 0            | 0.0         | 0        | 0.0         | 0          | 0.0         | 0         | 0.0         | 0         | 0.0         | 1           | 6.3         | 0        | 0.0         | 0            | 0.0         | 0        | 0.0         | 0         | 0.0         |
| Duplication                                      | 2          | 0.4         | 1             | 1.7         | 0            | 0.0         | 0        | 0.0         | 0          | 0.0         | 0         | 0.0         | 1         | 7.1         | 0           | 0.0         | 0        | 0.0         | 0            | 0.0         | 0        | 0.0         | 0         | 0.0         |
| <b>EBF1 heterozygous deletion</b>                | <b>13</b>  | <b>5.6</b>  | <b>0</b>      | <b>0.0</b>  | <b>2</b>     | <b>28.6</b> | <b>1</b> | <b>25.0</b> | <b>6</b>   | <b>16.7</b> | <b>0</b>  | <b>0.0</b>  | <b>0</b>  | <b>0.0</b>  | <b>3</b>    | <b>18.8</b> | <b>0</b> | <b>0.0</b>  | <b>0</b>     | <b>0.0</b>  | <b>0</b> | <b>0.0</b>  | <b>1</b>  | <b>1.4</b>  |
| <b>ERG heterozygous deletion</b>                 | <b>9</b>   | <b>3.9</b>  | <b>1</b>      | <b>1.7</b>  | <b>1</b>     | <b>14.3</b> | <b>0</b> | <b>0.0</b>  | <b>0</b>   | <b>0.0</b>  | <b>0</b>  | <b>0.0</b>  | <b>1</b>  | <b>7.1</b>  | <b>0</b>    | <b>0.0</b>  | <b>0</b> | <b>0.0</b>  | <b>1</b>     | <b>11.1</b> | <b>0</b> | <b>0.0</b>  | <b>5</b>  | <b>7.0</b>  |
| <b>PAR1 deletion</b>                             | <b>2</b>   | <b>0.9</b>  | <b>1</b>      | <b>1.7</b>  | <b>0</b>     | <b>0.0</b>  | <b>0</b> | <b>0.0</b>  | <b>0</b>   | <b>0.0</b>  | <b>0</b>  | <b>0.0</b>  | <b>0</b>  | <b>0.0</b>  | <b>1</b>    | <b>6.3</b>  | <b>0</b> | <b>0.0</b>  | <b>0</b>     | <b>0.0</b>  | <b>0</b> | <b>0.0</b>  | <b>0</b>  | <b>0.0</b>  |

**Supplementary Table S3. Detailed subtype, karyotype, MLPA P036 and DNA index results of B-ALL in this study.**

| <b>ID</b> | <b>Subtype</b>                       | <b>Karyotype</b>                                                                                                                                    | <b>MLPA P036</b>                                           | <b>DNA index</b> |
|-----------|--------------------------------------|-----------------------------------------------------------------------------------------------------------------------------------------------------|------------------------------------------------------------|------------------|
| 778       | Hyperdiploidy                        | 64,XX,+X,+4,+5,+6,+8,+9,+11,+14,add(14)(q32),+15,+17,+18,+21,+22,+4mar[1]/63,XX,+X,+4,+5,+6,+8,+9,+11,+14,add(14)(q32),+15,+17,+18,+21,+22,+3mar[1] | 61,XX,+X,+X,+4,+5,+6,+8,+9,+10,+11,+14,+14,+17,+18,+21,+21 | NA               |
| 489       | Hyperdiploidy                        | 61,XY,+X,+4,+5,+6,+7,+8,+10,+12,+13,+14,+15,+17,+18,+21,+21[20]                                                                                     | 55,XY,+5,+7,+8,+10,+11,+14,+18,+21,+21                     | 1.183            |
| 990       | Hyperdiploidy                        | 56,XX,+X,+X,ins(1;?)(q21;?),+4,+6,del(9)(p?22),+10,+14,+17,+18,+21,+21[cp14]/46,XX[6]                                                               | 52,XX,+X,+4,+6,+10,+17,+21                                 | 1.191            |
| 792       | Hyperdiploidy                        | 54,XX,+8,+14,+14,+17,+21,+2mar,inc[cp3]/46,XX[17]                                                                                                   | 51,XX,+6,+14,+17,+18,+21                                   | 1.189            |
| 938       | Hyperdiploidy                        | 46,XX[20]                                                                                                                                           | 52,XX,+X,+10,+14,+17,+18,+21                               | NA               |
| 341       | Hyperdiploidy                        | 46,XY[20]                                                                                                                                           | 58,XY,+X,+4,+5,+6,+8,+10,+11,+12,+14,+17,+18,+21           | NA               |
| 800       | Hyperdiploidy                        | 46,XX[20]                                                                                                                                           | 55,XX,+X,+4,+6,+8,+10,+14,+17,+18,+21                      | 1.221            |
| 889       | Hyperdiploidy                        | 53,XY,+X,+4,+6,+14,+17,+18,+21[15]/46,XY[5]                                                                                                         | 51,XY,+4,+6,+14,+18,+21                                    | 1.165            |
| 436       | Hyperdiploidy                        | 67,XX,+X,+3,+4,+5,+6,del(6)(q21,q25),+8,+9,+10,+11,+11,+12,+14,+14,+15,+16,+17,+18,+20,+21,+21,+mar[cp16]/46,XX[4]                                  | NA                                                         | NA               |
| 159       | Hyperdiploidy                        | 46,XX[5]                                                                                                                                            | 53,XX,+5,+6,+10,+14,+17,+18,+21                            | 1.150            |
| 899       | Hyperdiploidy                        | 46,XY[8]/56-60,XY,+X,+Y,tri(1)(1q),+4,+5,+6,del(6q),+7,+10,del(10q),+14,+17,+18,+20,+21,+21,+22,inc[cp12]                                           | 55,XY,+X,+5,+6,+10,+14,+18,+18,+21,+21                     | 1.191            |
| 999       | Hyperdiploidy                        | 46,XY[4]                                                                                                                                            | 53,XY,+X,+4,+5,+6,+10,+14,+21                              | 1.221            |
| 829       | Hyperdiploidy/<br><i>P2RY8-CRLF2</i> | 46XY[20]                                                                                                                                            | 57,XY,+X,+X,+4,+8,+9,+10,+11,+14,+14,+21,+21               | NA               |
| 706       | Hyperdiploidy                        | 58,XX,+4,der(4),t(1;4)(q?12;q?35),+5,del(5)(p13p15),+6,+8,+10,+11,+14,+17,+18,+21,+22,+X[13]/ 46,XX[7]                                              | 58,XX,+X,+4,+5,+6,+8,+10,+11,+14,+17,+18,+21,+21           | NA               |
| 729       | Hyperdiploidy                        | 51,XY,+X,+4,-7,+10,+11,t(17;19)(q11.2;p13.3),+21,+21                                                                                                | 51,XY,+X,+4,-7,+10,+11,+21,+21                             | NA               |

|     |               |                                                                                                                                             |                                                                  |       |
|-----|---------------|---------------------------------------------------------------------------------------------------------------------------------------------|------------------------------------------------------------------|-------|
|     |               | [18]/46,XY[2]                                                                                                                               |                                                                  |       |
| 911 | Hyperdiploidy | 46,XY[20]                                                                                                                                   | 58,XY,+X,+4,+5,+6,+10,+12,+14,+16,+17,+18,+21,+22                | 1.218 |
| 442 | Hyperdiploidy | 46,XX[11]/62,XX,+X,+4,der(4)t(1;4)(q21;q28),+5,+6,+8,+9,+10,+11,i(12)(q10),+14,+15,+17,+18,+19,+21,+22,+22[10]                              | NA                                                               | NA    |
| 799 | Hyperdiploidy | 56,XY,+X,+4,+6,+8,+10,+14,+17,18,+21,+21[30]/57, idem,+9[3]/46,XY[2]                                                                        | 56,XY,+X,+4,+6,+8,+10,+14,+17,+18,+21,+21                        | 1.217 |
| 919 | Hyperdiploidy | 54-57,XX,+X,+add(1)(p13),t(2;3)(q21;q21),+4,+6,add(6)(p25),del(6)(q23q25),+8,+14,+17,+18,+add(19)(q13),+21,del(22)(q11),inc[cp13]/46,XY[10] | 54,XX,+4,+6,+8,+10,+14,+17,+18,+21                               | 1.195 |
| 144 | Hyperdiploidy | 46,XX[6]                                                                                                                                    | 61,XX,+X,+1,+4,+5,+6,+9,+10,+16,+17,+18,+20,+20,+21,+21,+22      | 1.328 |
| 472 | Hyperdiploidy | No mitosis                                                                                                                                  | 54,XY,+4,+6,+10,+14,+17,+18 +21,+21                              | NA    |
| 518 | Hyperdiploidy | 46,XY[20]                                                                                                                                   | 55,XY,+4,+6,+8,+10,+14,+17,+18,+21,+21                           | 1.215 |
| 549 | Hyperdiploidy | 54-57,XY,+8,+10,+11,+15,+16,+21,inc[cp20]                                                                                                   | 55,XY,+X,+4,+8,+10,+11,+14,+18,+21,+21                           | NA    |
| 551 | Hyperdiploidy | No mitosis                                                                                                                                  | 52,XX,+X,+4,+6,+14,+17,+21                                       | NA    |
| 581 | Hyperdiploidy | 58-60,+XX,+X,+4,+5,del(6)(q15q21),+10,+11,del(12)(p11p13),+17,+19,+21,inc[cp9]/46,XX[1]                                                     | 57,XX,+X,+4,+5,+10,+10,+11,+14,+17,+18,+21,+21                   | 1.225 |
| 584 | Hyperdiploidy | 52,XX,+3,del(5)(q22,q31),+8,+9,+17,+18,+22[20]                                                                                              | 54,XX,+X,+5,+6,+10,+14,+17,+21,+21                               | 1.175 |
| 590 | Hyperdiploidy | 46,XX[2]                                                                                                                                    | 53,XX,+X,+6,+10,+14,+18,+21,+21                                  | NA    |
| 686 | Hyperdiploidy | 65,XY,+X,+X,+3,+4,+5,+6,+8,+9,+10,+11,+11,+12,add(12)(p13),+14,+17,+18,+19,der(19)t(11;19)(q13;p13),+21,+21,+22[cp12]/46,XY[8]              | 63,XY,+X,+2,+3,+4,+5,+6,+7,+8,+9,+10,+11,+14,+17,+18,+21,+21,+22 | NA    |
| 692 | Hyperdiploidy | 53,XY,+Y,+4,+6,+14,+17,+19,+21,+Mar[cp5]/46,XY[15]                                                                                          | 54,XY,+4,+6,+10,+14,+17,+18,+21,+21                              | NA    |
| 698 | Hyperdiploidy | No mitosis                                                                                                                                  | 54,XY,+X,+4,+6,+10,+14,+17,+18,+21                               | NA    |
| 712 | Hyperdiploidy | 48-51,XY,+X,+6,+8,+14,-16,+18,+21,+mar[cp20]                                                                                                | 52,XY,+X,+6,+14,+18,+21,+21                                      | 1.110 |
| 720 | Hyperdiploidy | 54-57,XY,+X,+4,+6,+9,+10,+14,+17,+18,+19,+21,+21,                                                                                           | 54,XY,+X,+4,+6,+10,+14,+17,+18,+21                               | 1.162 |

|     |               |                                                                                                                                   |                                                       |       |
|-----|---------------|-----------------------------------------------------------------------------------------------------------------------------------|-------------------------------------------------------|-------|
|     |               | inc[cp16]/46,XY[4]                                                                                                                |                                                       |       |
| 737 | Hyperdiploidy | 46,XX[1]                                                                                                                          | 54,XX,+X,+6,+10,+14,+14,+17,+18,+21                   | 1.201 |
| 754 | Hyperdiploidy | 56,XX,+X,+3,+4,+6,+10,+10,+14,+18,+21,+21[13]/46,XX[7]                                                                            | 54,XX,+X,+3,+4,+10,+14,+18,+21,+21                    | 1.225 |
| 761 | Hyperdiploidy | 46,XY[20]                                                                                                                         | 54,XY,+X,+4,+6,+14,+17,+18,+21,+21                    | 1.152 |
| 775 | Hyperdiploidy | 46,XX[20]                                                                                                                         | 55,XX,+X,+X,+4,+10,+14,+17,+18,+21,+21                | NA    |
| 794 | Hyperdiploidy | 47,XY,+21[5]/53-57,XY,+X,-Y,+5,+6,+15,+17,+21,+21,+1~8mar,inc[cp11]/46,XY[4]                                                      | 55,XY,+X,+5,+6,+10,+15,+17,+18,+21,+21                | 1.181 |
| 833 | Hyperdiploidy | 46,XY[20]                                                                                                                         | 53,XY,+X,+4,+6,+14,+17,+18,+21                        | 1.160 |
| 836 | Hyperdiploidy | 46,XY[20]                                                                                                                         | 54,XY,+X,+4,+6,+10,+14,+17,+18,+21                    | NA    |
| 840 | Hyperdiploidy | 46,XX[20]                                                                                                                         | 53,XX,+X,+6,+10,+14,+17,+18,+21                       | 1.134 |
| 846 | Hyperdiploidy | 46,XY[9]                                                                                                                          | 54,XY,+X,+4,+7,+10,+14,+17,+18,+21                    | NA    |
| 852 | Hyperdiploidy | 63,XX,-3,add(3)(q13),+4,+5,+6,+6,del(6),+7,+8,+9,+10,+11,+12,+14,+14,+15,del(15)(q?12q?21),+16,+17,+20,+21,+21,inc[cp5]/46,XX[17] | 57,XX,+4,+5,+6,+8,+14,+14,+17,+18,+21,+21,+22         | NA    |
| 854 | Hyperdiploidy | 57,XY,+X,+4,+6,+7,+10,+14,+15,+17,+21,+21,+22[7]/46,XY[17]                                                                        | 56,XY,+4,+6,+8,+10,+14,+17,+18,+21,+21,+22            | NA    |
| 870 | Hyperdiploidy | 53-55,XX,dup(1)(q21q32),+4,+6,+9,+12,+13,+14,+17,+18,+21,+22,inc[cp13]/46,XX[7]                                                   | 54,XX,+X,+4,+6,+10,+14,+17,+18,+21                    | 1.174 |
| 883 | Hyperdiploidy | 58,XX,+X,+dup1q,+4,+5,+6,+7,+8,+9,+10,+14,+14,+17,+18,+18,+21,+21,+marker[4]/46,XX[17]                                            | 58,XX,+X,+4,+6,+7,+8,+10,+14,+14,+17,+18,+21,+21      | NA    |
| 885 | Hyperdiploidy | 58-59,XX,+X,+4,+6,+8,+10,+11+12,+14,+14,+19,+20,+21,+21,+22[18]/46,XX[2]                                                          | 59,XX,+X,+4,+6,+8,+10,+11,+12,+14,+17,+18,+21,+21,+22 | 1.264 |
| 890 | Hyperdiploidy | 47,XY,-11,+21,+mar1,+mar2[1]/56,XY,+4,+12,+13,+17,-19,+21,+21,+22,+mar1~mar4[1]/46,XY[6]                                          | 55,XY,+X,+4,+6,+10,+14,+14,+15,+17,+21                | NA    |
| 906 | Hyperdiploidy | 46,XX[3]/54-55,XX,+1,+1p,+4,+5,+6,+15,+17,+20,+21,+21,+22,inc[cp6]                                                                | 53,XX,+4,+6,+14,+17,+18,+21,+21                       | 1.126 |

|     |                     |                                                                                                                                                   |                                                                              |                 |
|-----|---------------------|---------------------------------------------------------------------------------------------------------------------------------------------------|------------------------------------------------------------------------------|-----------------|
| 917 | Hyperdiploidy       | 56-58,XX,+X,+4,+6,+8,+9,+10,+11,+14,+17p,+18,+18,-20,+21,+21[17]/56-58,XX,+X,+4,+6,+8,+9,+10,+11,+14,+17p,+18,+18,-20,+21,+21,del(2p)[2]/46,XX[1] | 55,XX,+X,+4,+6,+8,+10,+11,+14,+18,+21                                        | 1.226           |
| 921 | Hyperdiploidy       | 46,XY[25]                                                                                                                                         | 55,XY,+X,+6,+9,+10,+14,+17,+18,+21,+21                                       | NA              |
| 922 | Hyperdiploidy       | 46,XY[25]                                                                                                                                         | 55,XY,+X,+4,+6,+9,+14,+17,+18,+21,+21                                        | 1.126           |
| 926 | Hyperdiploidy       | 46,XY[11]/56-59,XY,+X,add(3q),+4,+5,+6,+8,+9,+10,+11,+12,add(12p),+14,+17,+18,+21,+21[cp9]                                                        | 59,XY,+X,+4,+5,+6,+8,+10,+11,+12,+14,+17,+18,+21,+21                         | 1.225           |
| 927 | Hyperdiploidy       | 46,XY[20]                                                                                                                                         | 59,XY,+X,+4,+5,+6,+9,+10,+12,+14,+17,+18,+20,+21,+22                         | 1.253           |
| 930 | Hyperdiploidy       | 46,XX[17]                                                                                                                                         | 57,XX,+X,+4,+5,+6,+9,+10,+12,+14,+17,+18,+21                                 | NA              |
| 960 | Hyperdiploidy       | 46,XX[15]/54-55,XX,+X,add(1q)(q1),add(1q)(q21),+6,+8,+11,+17,+19,+20,+21,inc[cp5]                                                                 | 54,XX,+4,+6,+8,+10,+14,+17,+18,+21                                           | 1.199           |
| 964 | Hyperdiploidy       | 46XY[1]                                                                                                                                           | 57,XY,+X,+4,+6,+8,+10,+14,+14,+17,+18,+21,+21                                | 1.209           |
| 968 | Hyperdiploidy       | 54,XY,+4,+6,+8,+10,+14,+18,+21,+21[1]/46,XY[3]                                                                                                    | 54,XY,+X,+4,+5,+10,+14,+17,+21,+21                                           | 1.176           |
| 973 | Hyperdiploidy       | 46,XX[4]                                                                                                                                          | 57,XX,+X,+4,+8,+10,+11,+14,+15,+17,+18,+21,+21                               | 1.263           |
| 977 | Hyperdiploidy       | 54,XY,+X,+6,+10,+14,+17,+18,+21,+21[15]/46,XY[5]                                                                                                  | 53,XY,+X,+6,+10,+14,+17,+18,+21                                              | 1.138           |
| 753 | Masked Hypodiploidy | 52-54,XX,+mar1~mar8[cp4]/46,XX[21]                                                                                                                | 27,X,-1,-2,-3,-5,-6,-7,-9,-10,-11,-12,-13,-15,-16,-17,-18,-19,-20,-22        | 1.17            |
| 952 | Hypodiploidy        | 26,XY,-1,-2,-3,-4,-5,-6,-7,-8,-9,-11,-12,-13,-14,-15,-16,-17,-18,-19,-20,-22[13]                                                                  | 26,XY,-1,-2,-3,-4,-5,-6,-7,-8,-9,-11,-12,-13,-14,-15,-16,-17,-18,-19,-20,-22 | 0.561           |
| 508 | Hypodiploidy        | 46,XY[20]                                                                                                                                         | 32,XY,-2,-3,-4,-6,-7,-9,-10,-12,-15,-16,-17,-18,-20,-22                      | NA              |
| 984 | Masked Hypodiploidy | 63,XX,-X,+1,-3,add(3)(q13),del(3)(q?21),-4,-5,+6,-7,-9,-9,-10,+12,-13,+14,-15,-16,-17,-20,+add(21)(q22)x2,+22,+2mar,inc[cp14]/46,XX[6]            | 33,XX,-3,-4,-5,-7,-8,-9,-10,-11,-13,-15,-16,-17,-20                          | 0.789/<br>1.535 |
| 925 | Hypodiploidy        | 42,X,-4,-9,-13,t(14;17)(q32;p11.2),add(21)(p11.2)[16]/84,idem x2[3]/46,XY[1]                                                                      | 42,Y,-4,-9,-13                                                               | 0.914           |
| 845 | Masked Hypodiploidy | 68,XX,-Y,+1,-2,-3,-4,del(4)(q21q31),del(5)(q13q33),+6,-7,+8,+9,-10,+11,-12,-13,+14,-15,-16,-17,-18,+19,+20,                                       | 34,Y,-2,-3,-4,-7,-10,-12,-13,-15,-16,-17-18                                  | 0.76/<br>1.43   |

|     |                   |                                                                                                                        |                                     |       |
|-----|-------------------|------------------------------------------------------------------------------------------------------------------------|-------------------------------------|-------|
|     |                   | +21,+22,inc[cp5]/46,XY[20]                                                                                             |                                     |       |
| 774 | Hypodiploidy      | 46,XY[25]                                                                                                              | 38,XY,-2,-3,-12,-13,-14,-15,-16,-17 | 0.818 |
| 689 | iAMP21            | 46,XX[20]                                                                                                              | 46,XX,+10,-20                       | 1     |
| 813 | iAMP21            | 46,XX[20]                                                                                                              | 48,XX,+X,+10                        | NA    |
| 306 | iAMP21            | 46,XY[14]/45,XY,-20q,-21[6]                                                                                            | 45,XY,-21                           | NA    |
| 188 | iAMP21            | 46,XX,-21[12]/46,XX[2]                                                                                                 | 46,XX                               | 1     |
| 545 | <i>ETV6-RUNX1</i> | 45,X,t(5;12)(q13;p13)[18]/46,XX[2]                                                                                     | 45,X                                | NA    |
| 857 | <i>ETV6-RUNX1</i> | 44,XX,-7,+9p,+11q,-15,+15p,+16q,+21p,+mar[7]/<br>46,XX[13]                                                             | 46,XX                               | NA    |
| 982 | <i>ETV6-RUNX1</i> | 46,XX,del(8)(q12q13),del(11)(q21q23),del(12)(p12),<br>dup(17)(q21q25)[cp11]/46,XX[9]                                   | 46,XX                               | 1     |
| 631 | <i>ETV6-RUNX1</i> | No mitosis                                                                                                             | 46,XY                               | NA    |
| 745 | <i>ETV6-RUNX1</i> | 47,XY,+21[3]/47,idem,del(2)(q35)[1]/49,idem,+6,+19<br>[1]/46,XY[4]                                                     | 47,XY,+21                           | NA    |
| 789 | <i>ETV6-RUNX1</i> | NA                                                                                                                     | 47,XX,+10                           | NA    |
| 933 | <i>ETV6-RUNX1</i> | 46,XX,del(6)(q13)[14]/46,XX[6]                                                                                         | 46,XX                               | 1     |
| 963 | <i>ETV6-RUNX1</i> | 46,XY,t(5;12)(q12;p12),del(11)(q14)[10]/45-46,XY,<br>t(1;8)(q23;q21.1),t(5;12)(q12;p12),del(11)(q14)[cp8]/<br>46,XY[1] | 46,XY                               | NA    |
| 724 | <i>ETV6-RUNX1</i> | 46,XY[8]                                                                                                               | 46,XY,-13,+21                       | NA    |
| 894 | <i>ETV6-RUNX1</i> | 45,X,-X,add(2)(p11.2),-8,+mar[1]/47,XX,+mar[1]/<br>46,XX[3]                                                            | 46,XX                               | NA    |
| 902 | <i>ETV6-RUNX1</i> | No mitosis                                                                                                             | 46,XY                               | NA    |
| 949 | <i>ETV6-RUNX1</i> | 46,XY[20]/46,XY,del(11)(q23)[1]                                                                                        | 46,XY                               | 1     |
| 986 | <i>ETV6-RUNX1</i> | 47,XY,dic(12;19)(p11;p11),t(18;19)(q11;p13),+19[20]                                                                    | 47,XY,+21                           | 1     |
| 989 | <i>ETV6-RUNX1</i> | 46,XY,t(8;12)(p10;p10)[10]/46,XY[10]                                                                                   | 46,XY                               | 1     |
| 796 | <i>ETV6-RUNX1</i> | 46,XX,del(12)(p11p13)[2]/46,XX[1]                                                                                      | NA                                  | NA    |
| 713 | <i>ETV6-RUNX1</i> | No mitosis                                                                                                             | 46,XY                               | NA    |

|     |                   |                                                                                 |               |       |
|-----|-------------------|---------------------------------------------------------------------------------|---------------|-------|
| 546 | <i>ETV6-RUNX1</i> | 46,XX[20]                                                                       | 46,XX         | NA    |
| 463 | <i>ETV6-RUNX1</i> | 46,XY[15]                                                                       | NA            | NA    |
| 347 | <i>ETV6-RUNX1</i> | 46,XY[14]                                                                       | 46,XY         | NA    |
| 553 | <i>ETV6-RUNX1</i> | No mitosis                                                                      | 46,XY         | NA    |
| 614 | <i>ETV6-RUNX1</i> | 47,XY,+10,del(12)(p11p13)[1]/46,XY[4]                                           | 47,XY,+10     | NA    |
| 888 | <i>ETV6-RUNX1</i> | 48,XX,+10,t(12;19)(p11;p13),+21[17]/46,XX[3]                                    | 48,XX,+10,+21 | NA    |
| 510 | <i>ETV6-RUNX1</i> | 46,XY[20]                                                                       | NA            | NA    |
| 886 | <i>ETV6-RUNX1</i> | 46,XX,add(6)(q?15),del(12)(p11p13),+21[7]/46,XX,<br>idem,add(16)(q22)[13]       | 46,XX         | NA    |
| 940 | <i>ETV6-RUNX1</i> | 46,XX[3]/46-47,X,add(12p),add(18p),+mar,+mar[cp7]                               | 46,XX         | 1     |
| 676 | <i>ETV6-RUNX1</i> | 46,XX[6]                                                                        | 46,XX         | NA    |
| 747 | <i>ETV6-RUNX1</i> | 46,XX[8]                                                                        | NA            | NA    |
| 752 | <i>ETV6-RUNX1</i> | 46,XY[20]                                                                       | 47,XY,+21     | NA    |
| 806 | <i>ETV6-RUNX1</i> | 46,XY[20]                                                                       | 46,XY         | NA    |
| 844 | <i>ETV6-RUNX1</i> | No mitosis                                                                      | 46,XY         | NA    |
| 877 | <i>ETV6-RUNX1</i> | 46,XX[20]                                                                       | 46,XX         | NA    |
| 974 | <i>ETV6-RUNX1</i> | No mitosis                                                                      | 46,XX         | NA    |
| 995 | <i>ETV6-RUNX1</i> | 46,XX[20]                                                                       | 46,XX         | 1.069 |
| 351 | <i>ETV6-RUNX1</i> | 46,XX[20]                                                                       | 45,X          | NA    |
| 767 | <i>ETV6-RUNX1</i> | 46,XY[20]                                                                       | 46,XY         | NA    |
| 682 | <i>ETV6-RUNX1</i> | 46,XY[5]                                                                        | 46,XY         | NA    |
| 386 | <i>TCF3-PBX1</i>  | 46,XY,t(1;19)(q23;p13)[20]                                                      | 46,XY         | NA    |
| 868 | <i>TCF3-PBX1</i>  | 46,XY,der(19)t(1;19)(q23;p13)[11]/46,XY[9]                                      | 46,XY         | NA    |
| 918 | <i>TCF3-PBX1</i>  | 46,XX[5]                                                                        | 46,XX         | 1     |
| 515 | <i>TCF3-PBX1</i>  | 42-47,XY,t(1;19)(q23;p13)[cp12]                                                 | 45,XY,-17     | NA    |
| 912 | <i>TCF3-PBX1</i>  | 46,XX,rea(9p),add(15)(p12),der(19)t(1;19)(q23;p13.3),<br>-21,+22[cp15]/46,XX[5] | 46,XX         | 1     |
| 612 | <i>TCF3-PBX1</i>  | 48,XY,t(1;19)(q23;p13),dup(6)(p21p25),+8,+20[19]/                               | 48,XY,+8,+20  | NA    |



|     |                     |                                                                                                                            |                     |       |
|-----|---------------------|----------------------------------------------------------------------------------------------------------------------------|---------------------|-------|
|     |                     | 46,XY[1]                                                                                                                   |                     |       |
| 679 | <i>TCF3-PBX1</i>    | 46,XX[20/20]                                                                                                               | 46,XY               | NA    |
| 688 | <i>TCF3-PBX1</i>    | 46,XX,der(19),t(1;19)(q23;p13)[7]/46,XX,<br>t(1;19)(q23;p13)[5]/46,XX[8]                                                   | 46,XX               | NA    |
| 700 | <i>TCF3-PBX1</i>    | 46,XX,der(19)t(1:19)(q23;p13)[9]/46,idm,<br>add(3)(q21)[2]                                                                 | 46,XX               | NA    |
| 728 | <i>TCF3-PBX1</i>    | 46,XX,t(1;19)(q23;p13)[10]/46,XX,del(6)(q21q25),<br>del(11)(q23),der(19),t(1;19)[4]/88,XXXX,-4,-17,-18,<br>-20[1]/46,XX[5] | 46,XX               | NA    |
| 898 | <i>TCF3-PBX1</i>    | 46,XX[20]                                                                                                                  | 46,XX               | NA    |
| 976 | <i>TCF3-PBX1</i>    | 46,XY,t(1;19)(q23;p13)[13]/46,XY[7]                                                                                        | 46,XY               | 1     |
| 658 | <i>KMT2A-EPS15</i>  | 46,XX,t(1;11)(p32;q23)[20]                                                                                                 | 46,XX               | NA    |
| 965 | <i>KMT2A-AFF1</i>   | No mitosis                                                                                                                 | 46,XX               | 1.055 |
| 657 | <i>KMT2A-MLLT3</i>  | 46,XY,t(9;20)[1]/46,XY[1]                                                                                                  | 45,XY,-17,-19,+22   | 1     |
| 331 | <i>KMT2A-AFF1</i>   | 46,XY,rea(9)(p13),rea(11)(q23)[20]                                                                                         | NA                  | NA    |
| 471 | <i>KMT2A-EPS15</i>  | 46,XX,t(1;11)(p32;q23)[4]/46,XX[6]                                                                                         | 46,XX               | NA    |
| 953 | <i>KMT2A-MLLT1</i>  | 50,XY,+X,+6,+21,+22,t(11;19)[20]                                                                                           | 50,XY,+X,+6,+21,+22 | 1     |
| 373 | <i>KMT2A-MLLT1</i>  | 48,XX,+X,+6,t(11;19)(q23;p13)[5]                                                                                           | 48,XX,+X,+6         | NA    |
| 554 | <i>KMT2A-AFF1</i>   | 46,XY,t(4;11)[20]                                                                                                          | 46,XY               | NA    |
| 623 | <i>KMT2A-AFF1</i>   | 46,XX,t(4;11)(q21;q23)[14]/46,XX[7]                                                                                        | 46,XX               | 1     |
| 630 | <i>KMT2A-AFF1</i>   | 46,XY,t(4;11)[10]/46,XY[10]                                                                                                | 46,XY               | NA    |
| 649 | <i>KMT2A-AFF1</i>   | 50,XY,+X,+1,+4,t(4;11)(q21;q23),+8,i(17)(q10)[6]/<br>50,XY,idem,+21[14]                                                    | 50,XY,+1,+4,+8,+20  | NA    |
| 656 | <i>KMT2A-AFF1</i>   | 46,XY,t(4;11)(q21;q23)[16]/47,idem,+8[4]                                                                                   | 46,XY               | NA    |
| 748 | <i>KMT2A-AFF1</i>   | 46,XX,t(4;11)(q21;q23)[13]/47,idem,+X[1]/48,XX,idem<br>,+X,+22[1]/47,XX,idem,+X,-5,-5,+del(6)(q21;q23)x2<br>[1]/46,XX[2]   | NA                  | NA    |
| 864 | <i>KMT2A-MLLT10</i> | 46,XX[14]/t(10;11)(p13q21)[6]                                                                                              | 46,XX               | 1     |

|     |                    |                                                                                                                                         |                        |    |
|-----|--------------------|-----------------------------------------------------------------------------------------------------------------------------------------|------------------------|----|
| 437 | <i>BCR-ABL1</i>    | 46,XX,t(9;22)(q34;q11.2)[20]                                                                                                            | NA                     | NA |
| 798 | <i>BCR-ABL1</i>    | 46,XY,del(3)(q12q29),del(7)(p13p15),i(8)(q10),<br>t(9;22)(q34;q11.2)[3]/46,XY[3]                                                        | 46,XY                  | NA |
| 598 | <i>BCR-ABL1</i>    | 46,XY,t(8;14)(p21;q32)[6]/46,s1,t(9;22)(q34;q11.2),<br>add(17)(q25)[14]                                                                 | 46,XY                  | NA |
| 705 | <i>P2RY8-CRLF2</i> | 46,XY,t(8;9)(q11;p13)[22]                                                                                                               | 46,XY                  | NA |
| 910 | <i>BCR-ABL1</i>    | 46,XX[25]                                                                                                                               | 46,XX                  | NA |
| 362 | <i>EPOR-IGH</i>    | 46,XY,t(9;10)(p22;q24)[9]/47-49,idem,+8,+21,+21,+22<br>[cp3]/45,idem,del(4)(p15p16),-7,der(10)t(9;10),<br>add(15)(p11),+mar[3]/46,XY[5] | 46,XY                  | NA |
| 937 | <i>BCR-ABL1</i>    | 46,XX[4]/46,XX,t(9;22)[13]/47,XX,der(22),t(9;22)[3]                                                                                     | 46,XX                  | 1  |
| 855 | <i>BCR-ABL1</i>    | 46,XX,t(6;12),t(9;22)(q34;q11.2)[20]                                                                                                    | NA                     | NA |
| 997 | <i>EBF1-PDGFRB</i> | 46,XY[6]                                                                                                                                | 46,XY                  | 1  |
| 520 | <i>BCR-ABL1</i>    | 45,XY,der(9)t(9;22)(q34;q11.2),add(19)(p13),-22[15]/<br>45,idem,del(11)(q23)[1]                                                         | NA                     | NA |
| 469 | <i>BCR-ABL1</i>    | 46,XX,t(9;22)(q34;q11.2)[17]                                                                                                            | NA                     | NA |
| 456 | <i>BCR-ABL1</i>    | 46,XY,t(9;22)(q34;q11.2)[11]/47,idem,+der(22)t(9;22)<br>[10]/48,idem,+8,+der(22)t(9;22)[3]/46,XY[1]                                     | NA                     | NA |
| 171 | <i>EBF1-PDGFRB</i> | 46,XY[3]                                                                                                                                | 46,XY                  | 1  |
| 892 | <i>BCR-ABL1</i>    | 46,XY[3]                                                                                                                                | 46,XY                  | NA |
| 435 | <i>BCR-ABL1</i>    | 47,XY,del(1q),+3,del(9q)[20]                                                                                                            | 51,XY,+X,+2,+6,+14,+21 | NA |
| 667 | <i>BCR-ABL1</i>    | 46,XY,t(9;22)(q34;q11.2)[20]                                                                                                            | 46,XY                  | NA |
| 439 | <i>TCF3-HLF</i>    | 45,XY,del(6)(q13,q25),der(9),add(9)(p24),<br>del(9)(q13q22),der(9),t(9;9)(p12;q21),-14,<br>t(17;19)(q22;p13)[11]/46,XY[9]               | 46,XY                  | NA |
| 784 | <i>TCF3-HLF</i>    | 46,XY,t(17;19)(q22;p13)[12]/46,XY,der(8),t(8;8),<br>t(17;19)(q22;p13),add(19p)[12]/49,XY,add(1p),+6,+7,<br>add(19p),-20,+22,+mar[1]     | 46,XY                  | 1  |

|      |                       |                                                                                                                                                    |                 |    |
|------|-----------------------|----------------------------------------------------------------------------------------------------------------------------------------------------|-----------------|----|
| 955  | <i>AKAP8-ZNF384</i>   | 46,XX[20]                                                                                                                                          | 46,XX           | 1  |
| 929  | <i>EWSR1-ZNF362</i>   | 46,XY,add(1)(p32),add(12)(q24.1),-13,-22,+2mar[3]/48,idem,add(1)(p32),+8[15]/56,idem,+X,add(1)(p32),+4,+8,+11,+11,+14,+17,+18,+19,+mar[8]/46,XY[2] | 46,XY           | 1  |
| 703  | <i>EP300-ZNF384</i>   | NA                                                                                                                                                 | 46,XX           | 1  |
| 1003 | <i>TCF4-ZNF384</i>    | 58,XY,+X,+1,+3,+5,+6,+7,+8,+9,+11,+15,+17,+22[1]/46,XY[19]                                                                                         | 46,XY           | 1  |
| 131  | <i>TCF3-ZNF384</i>    | 46,XX[8]                                                                                                                                           | 46,XX           | 1  |
| 947  | <i>EP300-ZNF384</i>   | 46,XX[9]/45,X,t(11;12),+22q,inc[11]                                                                                                                | 45,X            | 1  |
| 434  | <i>TCF3-ZNF384</i>    | 47,XX,+8[2]/46,XX[18]                                                                                                                              | 47,XX,+8        | NA |
| 983  | <i>EP300-ZNF384</i>   | 46,XY[11]                                                                                                                                          | 46,XY           | 1  |
| 772  | <i>TCF3-ZNF384</i>    | 46,XX,+4p,+16,-19[1]/46,XX[5]                                                                                                                      | 46,XX           | 1  |
| 970  | <i>MEF2D-HNRNPUL1</i> | 46,XX,del(9p)[20]                                                                                                                                  | 46,XX           | 1  |
| 832  | <i>MEF2D-BCL9</i>     | 46,XX,del(3)(q23)[1]/46,XX,-13,+mar[1]/45,XX,-13,-14,+mar[1]                                                                                       | 46,XX           | NA |
| 507  | <i>MEF2D-BCL9</i>     | 46,XX[20]                                                                                                                                          | 46,XX           | NA |
| 576  | Other                 | 46,XY[20]                                                                                                                                          | 46,XY           | NA |
| 954  | Other                 | 46,XX,del(9)(p13)[1]/46,XX[24]                                                                                                                     | 46,XX           | 1  |
| 783  | Other                 | 46,XX[20]                                                                                                                                          | 47,XX,+8,-9,+18 | NA |
| 985  | Other                 | 46,XY[25]                                                                                                                                          | 45,XY,-7        | 1  |
| 543  | Other                 | 46,XY[1]                                                                                                                                           | 45,XY,-7        | 1  |
| 909  | Other                 | 46,XY[9]                                                                                                                                           | 44,XY,-7,-9     | NA |
| 299  | Other                 | 46,XY,t(1,7)[20]                                                                                                                                   | 46,XY           | 1  |
| 779  | Other                 | No mitosis                                                                                                                                         | 47,XY,+5        | 1  |
| 914  | Other                 | 46,XY,del(9)(p22)[21]                                                                                                                              | 46,XY           | 1  |
| 710  | Other                 | 46,XX[16]                                                                                                                                          | 45,XX,-7        | 1  |
| 683  | Other                 | 46,XY[4]                                                                                                                                           | 46,XY           | 1  |
| 503  | Other                 | 47,XY,+X,rea(20p)[2]/46,XY[18]                                                                                                                     | 47,XY,+X        | 1  |

|     |       |                                                                             |                      |       |
|-----|-------|-----------------------------------------------------------------------------|----------------------|-------|
| 872 | Other | 45,XX,-20[14]/46,XX[6]                                                      | 46,XX                | 1     |
| 193 | Other | NA                                                                          | 49,XY,+X,+4,+12      | 1.085 |
| 856 | Other | 45,XY,der(9),t(9;16)(p13;q13),-16[9]/46,XY[14]                              | NA                   | 1     |
| 476 | Other | 45,XY,t(1;8)(p34;p24),rea(11q),-18[16]/44,XY,iden,-21[3]/46,XY[2]           | 46,XY                | 1     |
| 628 | Other | 47,XY,+9[19]/47,idem,+18,-21[1]                                             | 47,XY,+9             | 1     |
| 777 | Other | 46,XX,t(2;5)(p13;q13),del(11)(q21q23)[5]/46,idem,del(7)(p13p15)[8]/46,XX[7] | 46,XX                | 1     |
| 441 | Other | 46,XY,t(9;19)[20]                                                           | NA                   | NA    |
| 473 | Other | 46,XX[20]                                                                   | 46,XX                | NA    |
| 646 | Other | No mitosis                                                                  | 45,X                 | 1     |
| 699 | Other | 47,XX,+21[1]                                                                | 47,XX,+21            | 1     |
| 781 | Other | NA                                                                          | 48,XY,+8,+18         | 1     |
| 863 | Other | 47,XX,der(1;9)(q10;q10),add(17)(p13),+mar[6]/46,XX[19]                      | 46,XX                | 1     |
| 979 | Other | 46,XX,t(14;19)(q32;q13)[4]/47,idem,+4[15]/46,XX[1]                          | 47,XX,+4             | 1.055 |
| 495 | Other | No mitosis                                                                  | NA                   | NA    |
| 690 | Other | 46,XY[20]                                                                   | 46,XY                | 1     |
| 814 | Other | 46,XX[20]                                                                   | 46,XX                | 1     |
| 537 | Other | 45,XX,-4p,-9q,-18,+20q[18]/46,XX[2]                                         | NA                   | NA    |
| 338 | Other | 46,XY[20]                                                                   | NA                   | NA    |
| 632 | Other | 45-46,XX,del(11)(q13,q23),add(12)(p13),inc[cp4]/46,xx[3]                    | 46,XX                | 1     |
| 563 | Other | 50,XX,+X,+17,+21,+21[13]/46,XX[9]                                           | 50,XX,+X,+17,+21,+21 | 1.075 |
| 452 | Other | NA                                                                          | NA                   | NA    |
| 282 | Other | 45,X,-Y[5]/46,XY[11]                                                        | 46,XY                | 1     |
| 470 | Other | 46,XX[10]                                                                   | NA                   | NA    |
| 787 | Other | 46,XX[20]                                                                   | 46,XX                | 1     |

|     |       |                                                                                                  |           |    |
|-----|-------|--------------------------------------------------------------------------------------------------|-----------|----|
| 807 | Other | 46,XY[4]                                                                                         | 46,XY     | 1  |
| 450 | Other | NA                                                                                               | NA        | NA |
| 438 | Other | 46,XY[19]/46,XY,-8q[1]                                                                           | 46,XY     | NA |
| 696 | Other | 46,XY[20]                                                                                        | 46,XY     | NA |
| 782 | Other | 45,X,-Y[1]/46,XY[19]                                                                             | 46,XY     | 1  |
| 164 | Other | 46,X,del(Y)(q1?2),t(5;7)(p13;p11),add(7)(p14)[5]/46,XY,t(13;14)(q12;q32)[1]/46,XY[1]             | 47,XY,+20 | 1  |
| 50  | Other | 46,XX[20]                                                                                        | 45,X,-9   | 1  |
| 804 | Other | 46,XY[20]                                                                                        | 46,XY     | 1  |
| 866 | Other | 46,XY[20]                                                                                        | 46,XY     | 1  |
| 981 | Other | 46,XX,t(3;11)(p21;q23)[cp17]/46,XX[3]                                                            | 46,XX     | NA |
| 337 | Other | 46,XY[20]                                                                                        | NA        | NA |
| 404 | Other | 46,XY[20]                                                                                        | NA        | NA |
| 448 | Other | 46,XX[5]                                                                                         | NA        | NA |
| 461 | Other | 46,XX,rea(1q),rea(19q)[cp9]/46,XX[11]                                                            | NA        | NA |
| 462 | Other | 46,XY[20]                                                                                        | NA        | NA |
| 460 | Other | 52,XY,+X,+Y,+9,+9,-17,+21,+21,+mar[8]/46,XY[2]                                                   | NA        | NA |
| 564 | Other | 42,Y,-X,-2,-7,-22[1]/40,XY,-5,-8,-9,-11,-13,-13[2]                                               | 46,XY     | NA |
| 372 | Other | 46,XY[20]                                                                                        | 46,XY     | NA |
| 544 | Other | 46,XX[8]                                                                                         | 46,XX     | 1  |
| 893 | Other | 46,XX[24]                                                                                        | 46,XX     | NA |
| 474 | Other | 46,XY,t(2;16)(p10;q10),del(17)(q11.2)[4]/47,idem,+mar[1]/46,XY,del(3)(p10),del(11p)[1]/46,XY[14] | NA        | NA |
| 425 | Other | 46,XX,i(17)(q10)[4]/46,XX[12]                                                                    | 46,XX     | NA |
| 529 | Other | 46,XY[20]                                                                                        | 46,XY     | NA |
| 541 | Other | 46,XX[20]                                                                                        | 46,XX     | 1  |
| 653 | Other | 46,XY[7]                                                                                         | 46,XY     | 1  |
| 734 | Other | 46,XY,t(7;15)(q22;q15)[8]/46,XY[12]                                                              | 46,XY     | 1  |

|     |       |                                                                            |              |    |
|-----|-------|----------------------------------------------------------------------------|--------------|----|
| 738 | Other | 46,XY,del(6)(q?13q?23)[1]/46,XY[13]                                        | 46,XY        | 1  |
| 776 | Other | 46,XX[22]                                                                  | 46,XX        | NA |
| 786 | Other | 46,XX,t(8;14)[20]                                                          | 46,XX        | NA |
| 790 | Other | 46-47,XY,i(5)(q10),del(9)(p21p24),del(12)(p11),+2mar,<br>inc[cp2]/46,XY[3] | 47,XY,+18    | 1  |
| 827 | Other | 48,XY,+5,+21[12]/46,XY[8]                                                  | 48,XY,+5,+21 | 1  |
| 928 | Other | 46,XX[17]                                                                  | 47,XX,+21    | 1  |
| 959 | Other | 46,XX[3]                                                                   | 46,XX        | 1  |
| 465 | Other | 46,XX[7]                                                                   | NA           | NA |
| 440 | Other | 46,XY[20]                                                                  | 46,XY        | NA |

**Supplementary Table S4. STR profiling of masked hypodiploidy and high hyperdiploidy B-ALL cases.**

| Patient ID   |      | Pt984               |           |                      |        |                  | Pt845               |          |                      |        | Pt753*              |        |        | Pt990              |         |                      |        |
|--------------|------|---------------------|-----------|----------------------|--------|------------------|---------------------|----------|----------------------|--------|---------------------|--------|--------|--------------------|---------|----------------------|--------|
| Ploddy Group |      | Masked Hypodiploidy |           |                      |        |                  | Masked Hypodiploidy |          |                      |        | Masked Hypodiploidy |        |        | High Hyperdiploidy |         |                      |        |
| STR loci     | Chr. | Origin              |           | STR loss<br>in tumor | CN     | LOH              | Origin              |          | STR loss<br>in tumor | CN     | Origin              | CN     | LOH    | Origin             |         | STR loss<br>in tumor | CN     |
|              |      | Tumor               | Germline  |                      |        |                  | Tumor               | Germline |                      |        | Tumor               |        |        | Germline           | Tumor   |                      |        |
| D1S1656      | 1    | 13/16.3             | 13/16.3   | N                    | Gain   | Normal           | 12/15               | 12/15    | N                    | Gain   | 14/14               | Normal | LOH    | 11/14              | 11/14   | N                    | Normal |
| D2S1338      | 2    | 20/24               | 20/24     | N                    | Gain   | Normal           | 25/25               | 19/25    | Y                    | Normal | 19/19               | Normal | LOH    | 19/23              | 19/23   | N                    | Normal |
| D2S441       | 2    | 11/12               | 11/12     | N                    | Gain   | Normal           | 12/12               | 10/12    | Y                    | Normal | 12/12               | Normal | LOH    | 11/12              | 11/12   | N                    | Normal |
| TPOX         | 2    | 8/12                | 8/12      | N                    | Gain   | Normal           | 9/9                 | 9/11     | Y                    | Normal | 8/8                 | Normal | LOH    | 8/11               | 8/11    | N                    | Normal |
| D3S1358      | 3    | 15/15               | 15/15     | N                    | Normal | LOH              | 16/16               | 16/16    | N                    | Normal | 17/17               | Normal | LOH    | 16/17              | 16/17   | N                    | Normal |
| FGA          | 4    | 20/20               | 20/21     | Y                    | Normal | LOH              | 25/25               | 23/25    | Y                    | Normal | 19/24               | Gain   | Normal | 21/22              | 21/22   | N                    | Gain   |
| CSF1PO       | 5    | 12/12               | 12/12     | N                    | Gain   | LOH              | 10/12               | 10/12    | N                    | Gain   | 12/12               | Normal | LOH    | 8/10               | 8/10    | N                    | Normal |
| D5S818       | 5    | 11/11               | 11/12     | Y                    | Normal | LOH              | 11/13               | 11/13    | N                    | Gain   | 10/10               | Normal | LOH    | 9/11               | 9/11    | N                    | Normal |
| D6S1043      | 6    | 19/19               | 19/19     | N                    | Gain   | Normal           | 19/20               | 19/20    | N                    | Gain   | 18/18               | Normal | LOH    | 11/13              | 11/13   | N                    | Gain   |
| D7S820       | 7    | 8/8                 | 8/11      | Y                    | Normal | LOH              | 12/12               | 11/12    | Y                    | Normal | 12/12               | Normal | LOH    | 10/12              | 10/12   | N                    | Normal |
| D8S1179      | 8    | 17/17               | 13/17     | Y                    | Normal | LOH              | 10/13               | 10/13    | N                    | Gain   | 10/13               | Gain   | Normal | 14/15              | 14/15   | N                    | Normal |
| D10S1248     | 10   | 16/16               | 15/16     | Y                    | Normal | LOH <sup>#</sup> | 13/13               | 12/13    | Y                    | Normal | 13/13               | Normal | LOH    | 13/15              | 13/15   | N                    | Gain   |
| TH01         | 11   | 10/10               | 10/10     | N                    | Gain   | Normal           | 7/9.3               | 7/9.3    | N                    | Gain   | 9/9                 | Normal | LOH    | 6/8                | 6/8     | N                    | Normal |
| vWA          | 12   | 14/18               | 14/18     | N                    | Gain   | Normal           | 15/15               | 15/18    | Y                    | Normal | 16/16               | Normal | LOH    | 17/17              | 17/17   | N                    | Normal |
| D12S391      | 12   | 16/21               | 16/21     | N                    | Gain   | Normal           | 17/17               | 17/20    | N                    | Gain   | 18/19               | Normal | LOH    | 18/21              | 18/21   | N                    | Normal |
| D13S317      | 13   | 11/11               | 9/11      | Y                    | Normal | LOH              | 11/11               | 11/11    | N                    | Normal | 11/11               | Normal | LOH    | 8/9                | 8/9     | N                    | Normal |
| D16S539      | 16   | 11/11               | 11/11     | N                    | Normal | LOH              | 9/9                 | 9/11     | Y                    | Normal | 9/9                 | Normal | LOH    | 10/11              | 10/11   | N                    | Normal |
| D18S51       | 18   | 18/21               | 18/21     | N                    | Gain   | Normal           | 19/19               | 13/19    | Y                    | Normal | 16/16               | Normal | LOH    | 13/15              | 13/15   | N                    | Normal |
| D19S433      | 19   | 15.2/16.2           | 15.2/16.2 | N                    | Gain   | Normal           | 14/14               | 14/14    | N                    | Gain   | 14/14               | Normal | LOH    | 13/14.2            | 13/14.2 | N                    | Normal |
| D21S11       | 21   | 28/32.2             | 28/32.2   | N                    | Gain   | Normal           | 29/32.2             | 29/32.2  | N                    | Gain   | 28/30               | Gain   | Normal | 30/31              | 30/31   | N                    | Gain   |
| D22S1045     | 22   | 11/15               | 11/15     | N                    | Gain   | Normal           | 15/17               | 15/17    | N                    | Gain   | 11/11               | Normal | LOH    | 11/17              | 11/17   | N                    | Normal |
| Amelogenin   | X/Y  | X/X                 | X/X       | N                    | Gain   | Normal           | X/X                 | X/Y      | Y                    | Normal | X/X                 | Normal | LOH    | X/X                | X/X     | N                    | Normal |

STR: short tandem repeat; Y: Yes; N: No; CN: copy number; LOH: loss of heterozygosity

\*: germline sample was not available for testing; # LOH on 10q only

LOH was interpreted using CytoScan array result; CN was interpreted using either CytoScan array or MLPA P036

**Supplementary Table S5. 5-year EFS and OS using univariate and multivariate survival analysis.**

| 5-year EFS   |            |           |         |              |           |         |
|--------------|------------|-----------|---------|--------------|-----------|---------|
|              | Univariate |           |         | Multivariate |           |         |
|              | HR         | 95% CI    | P-value | HR           | 95% CI    | P-value |
| <i>IKZF1</i> | 1.61       | 0.94-2.77 | 0.083   | 1.07         | 0.60-1.91 | 0.820   |
| Age          | 2.09       | 1.26-3.48 | 0.005   | 2.15         | 1.26-3.68 | 0.005   |
| Gender       | 0.55       | 0.33-0.93 | 0.024   | 0.57         | 0.34-0.97 | 0.039   |
| WBC          | 2.06       | 1.16-3.64 | 0.013   | 1.89         | 1.06-3.38 | 0.032   |
| Protocol     | 0.38       | 0.20-0.73 | 0.004   | 0.36         | 0.18-0.70 | 0.003   |

  

| 5-year OS    |            |           |         |              |           |         |
|--------------|------------|-----------|---------|--------------|-----------|---------|
|              | Univariate |           |         | Multivariate |           |         |
|              | HR         | 95% CI    | P-value | HR           | 95% CI    | P-value |
| <i>IKZF1</i> | 1.07       | 0.54-2.10 | 0.854   | 0.62         | 0.30-1.29 | 0.204   |
| Age          | 2.27       | 1.27-4.07 | 0.006   | 2.78         | 1.51-5.14 | 0.001   |
| Gender       | 0.51       | 0.28-0.95 | 0.034   | 0.50         | 0.27-0.94 | 0.032   |
| WBC          | 2.47       | 1.32-4.64 | 0.005   | 2.45         | 1.28-4.69 | 0.007   |
| Protocol     | 0.37       | 0.16-0.86 | 0.020   | 0.40         | 0.18-0.93 | 0.033   |

EFS, event-free survival; OS, overall survival; HR, hazard ratio; CI, confidence interval.

*IKZF1* (reference = *IKZF1* wild type); Age (reference = <10 years); Gender (reference = female); WBC (reference = <100 x 10<sup>9</sup>/liter); Protocol (reference = TPOG-2002).



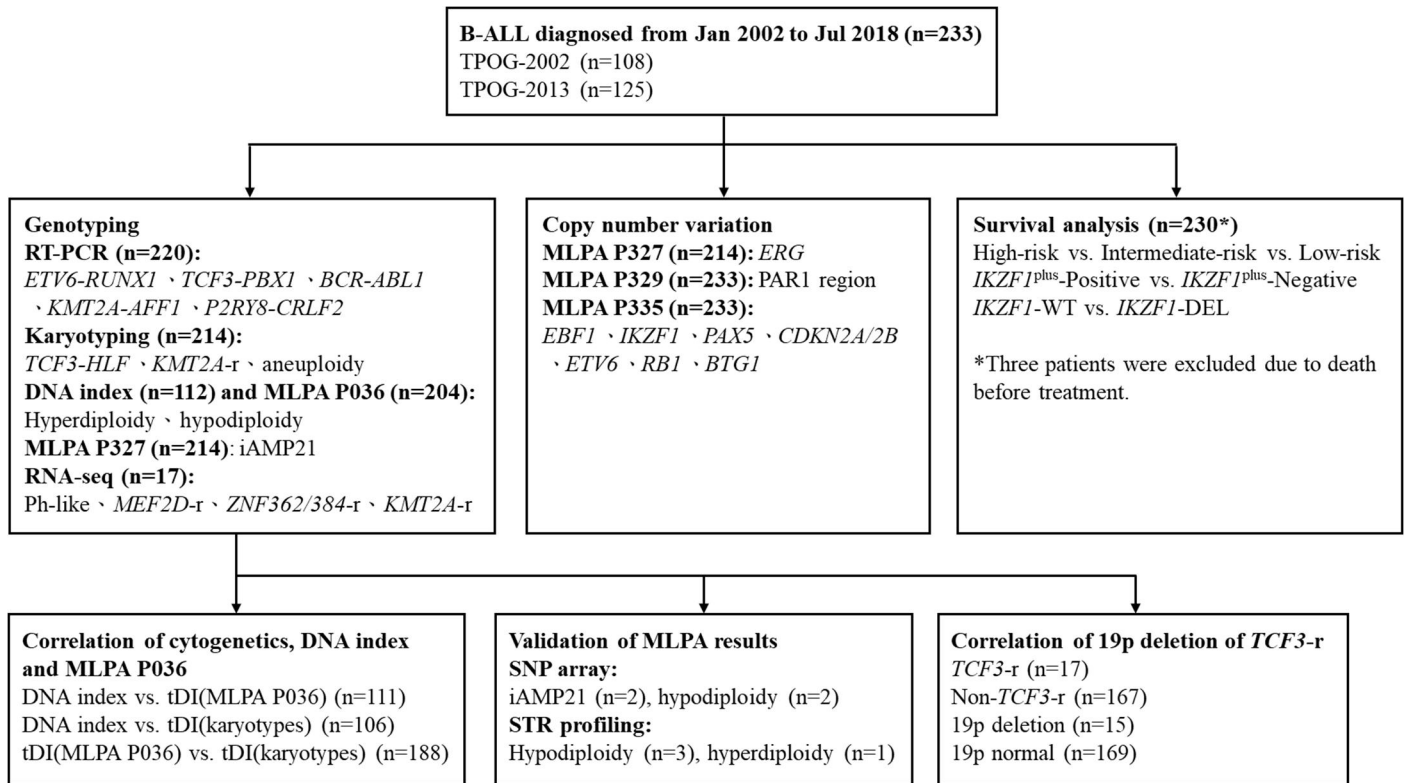

**Supplementary Figure S1. Flow diagram of analysis through this study.**

Types of analysis and patient numbers assayed in each analysis were demonstrated.

(a)

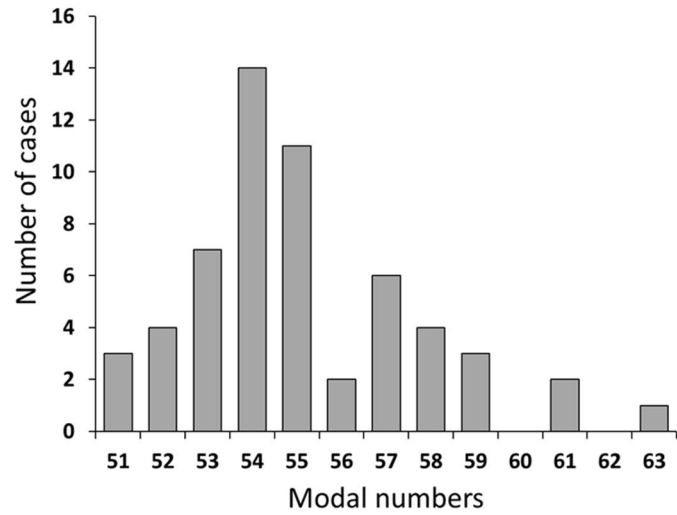

(b)

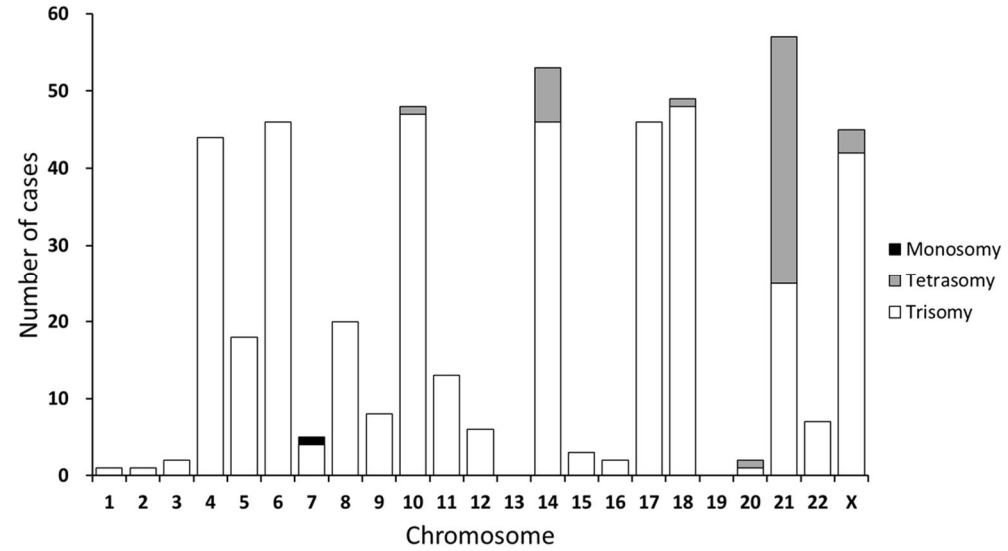

**Supplementary Figure S2. Analysis of high hyperdiploidy cases.**

(a) Distribution of 57 cases of childhood hyperdiploid acute lymphoblastic leukemia cases by modal chromosome number. (b) Number of childhood hyperdiploid acute lymphoblastic leukemia cases with monosomy, trisomy, and tetrasomy of each chromosome (N =57).

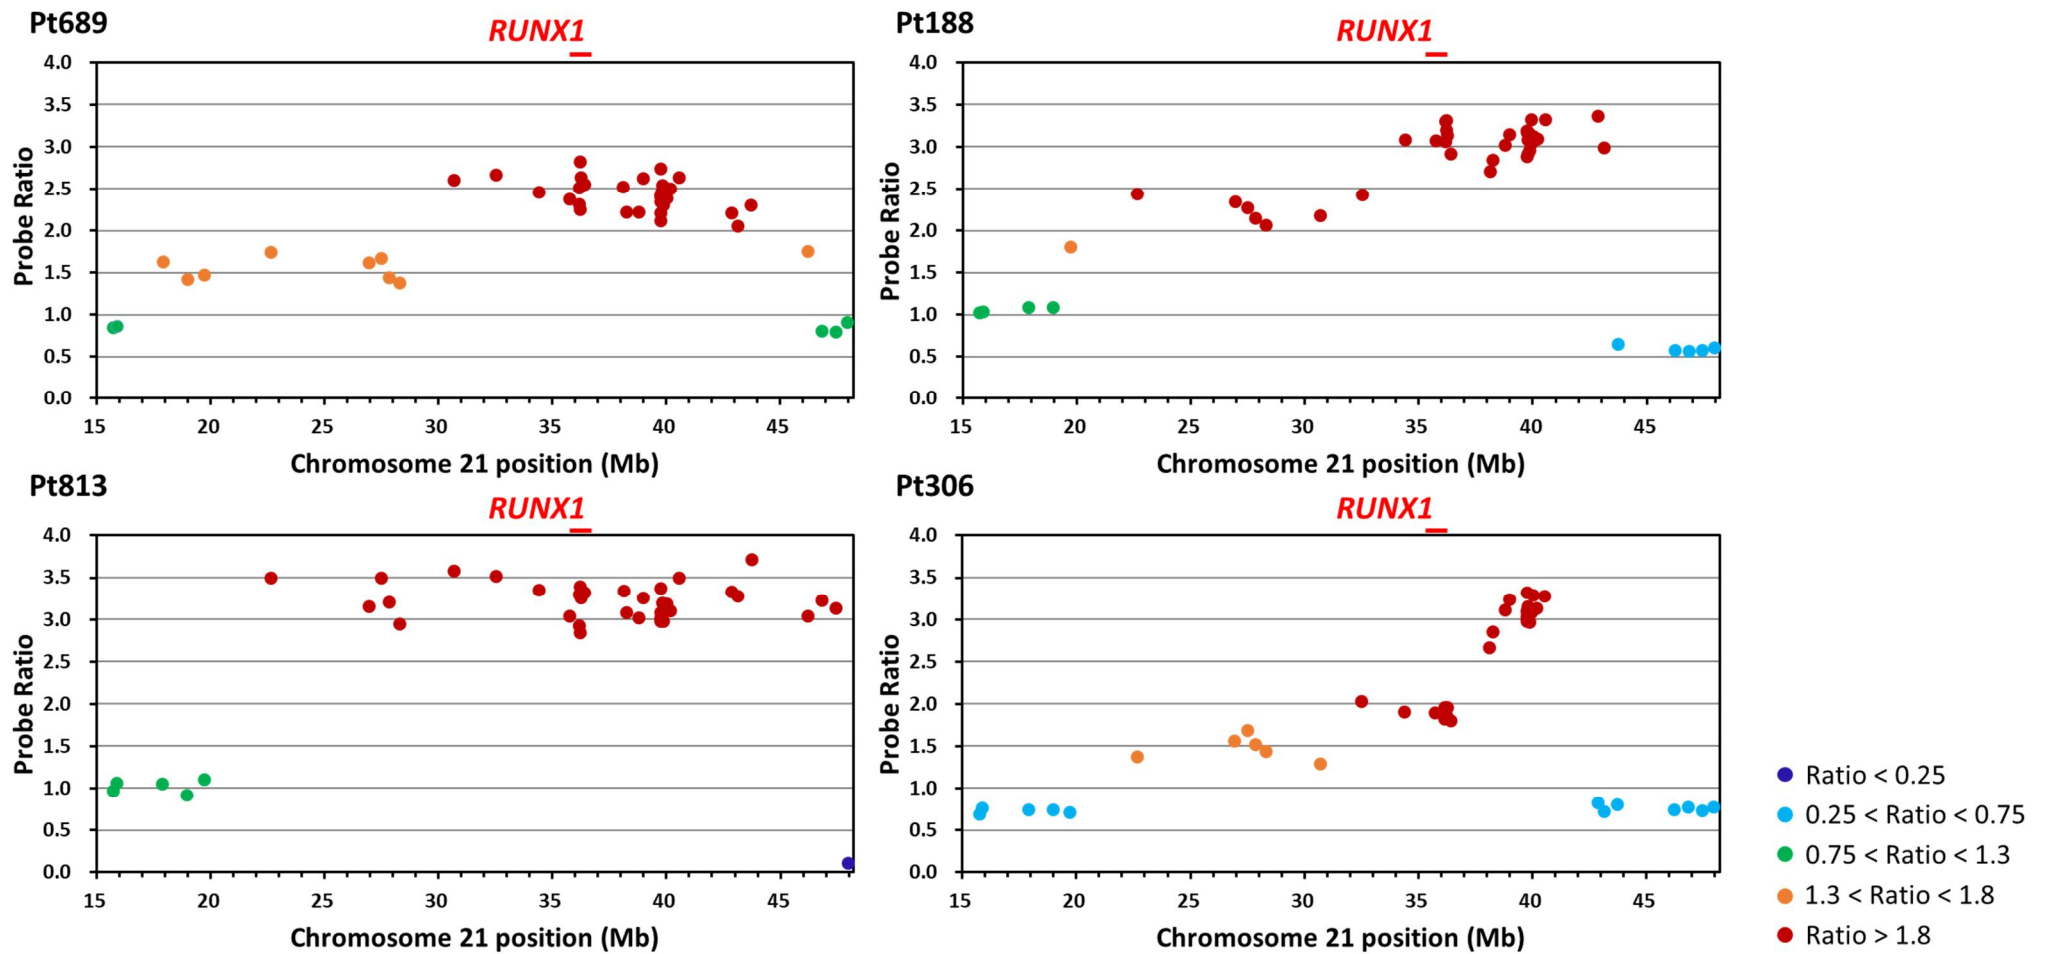

**Supplementary Figure S3. The MLPA P327 of iAMP21-ALL.**

The *RUNX1* (36.16-36.42 Mb) is the highest level of amplification on chromosome 21 in three cases of iAMP21 in this cohort. However, *RUNX1* is not within the highest level of amplification on chromosome 21 in patient 306.

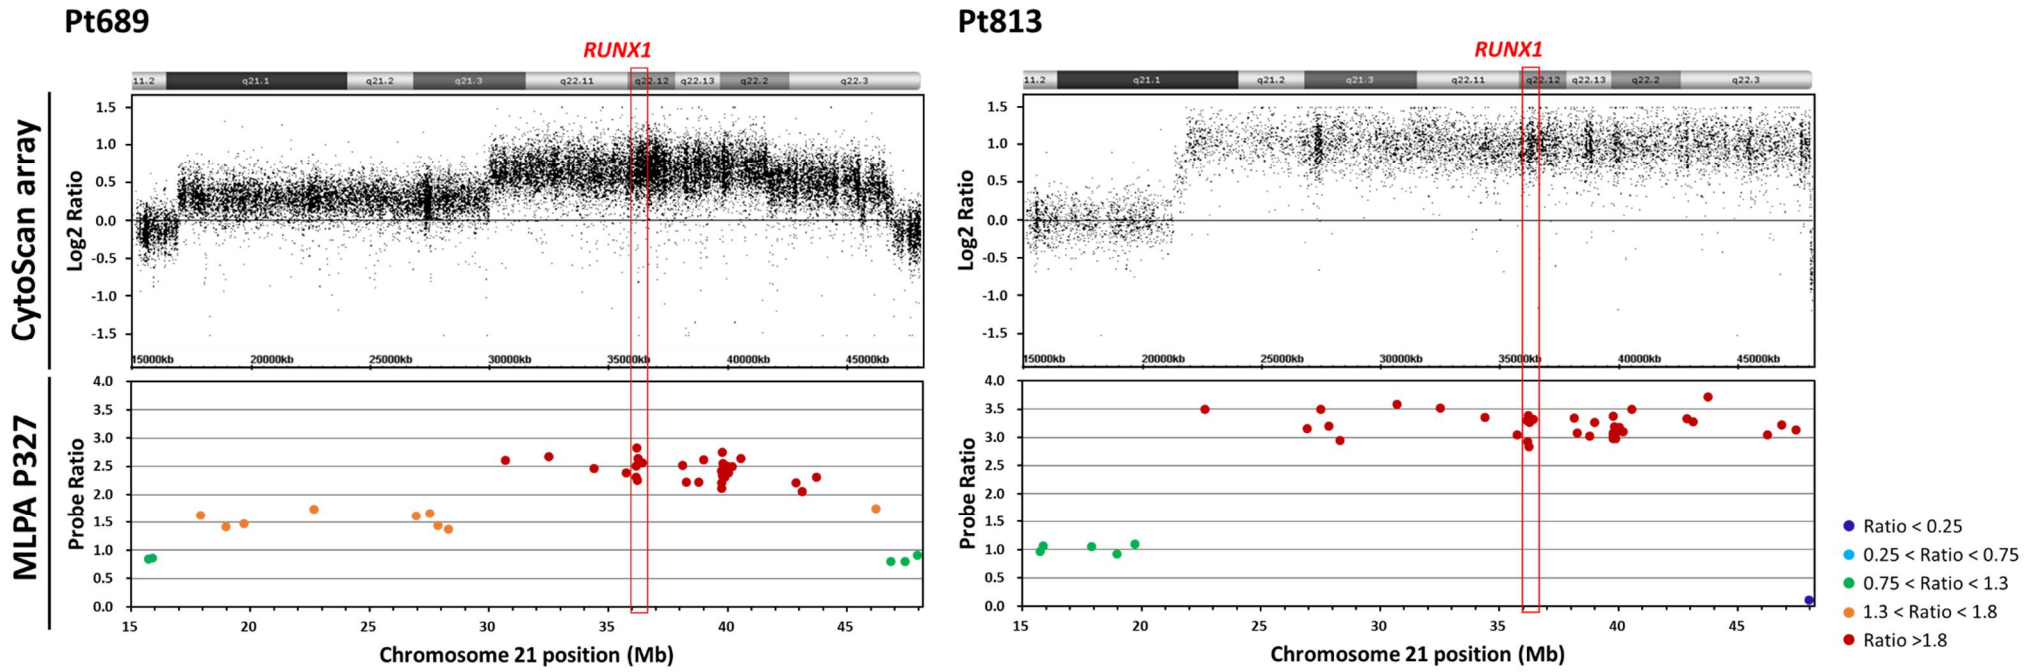

**Supplementary Figure S4. The results of CytoScan HD (Pt689) or 750K (Pt813) array.**

The results of array are compatible with the results of MLPA P327 and both of methods are able to detect iAMP21. The genomic location of *RUNX1* (36.16-36.42 Mb) is highlighted.

(a)

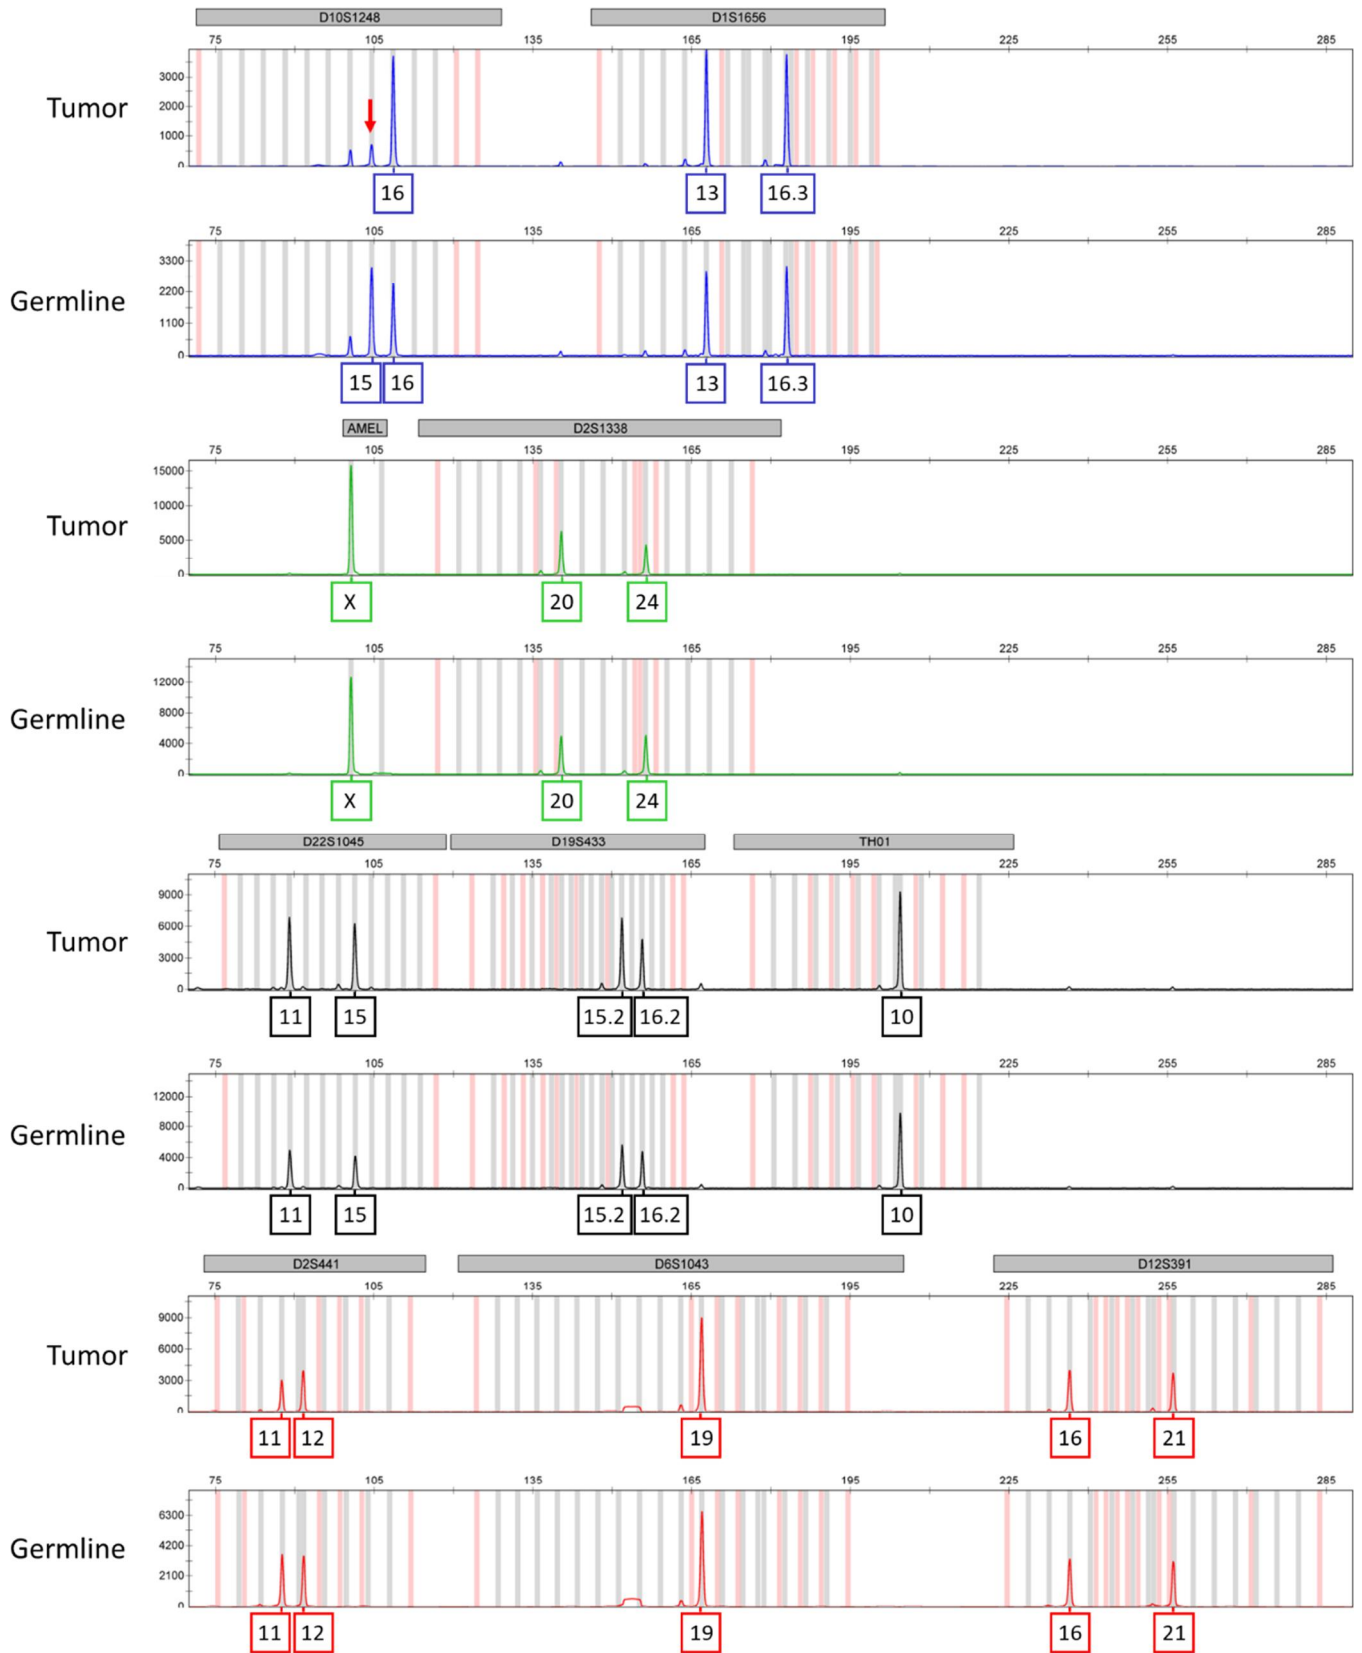

(b)

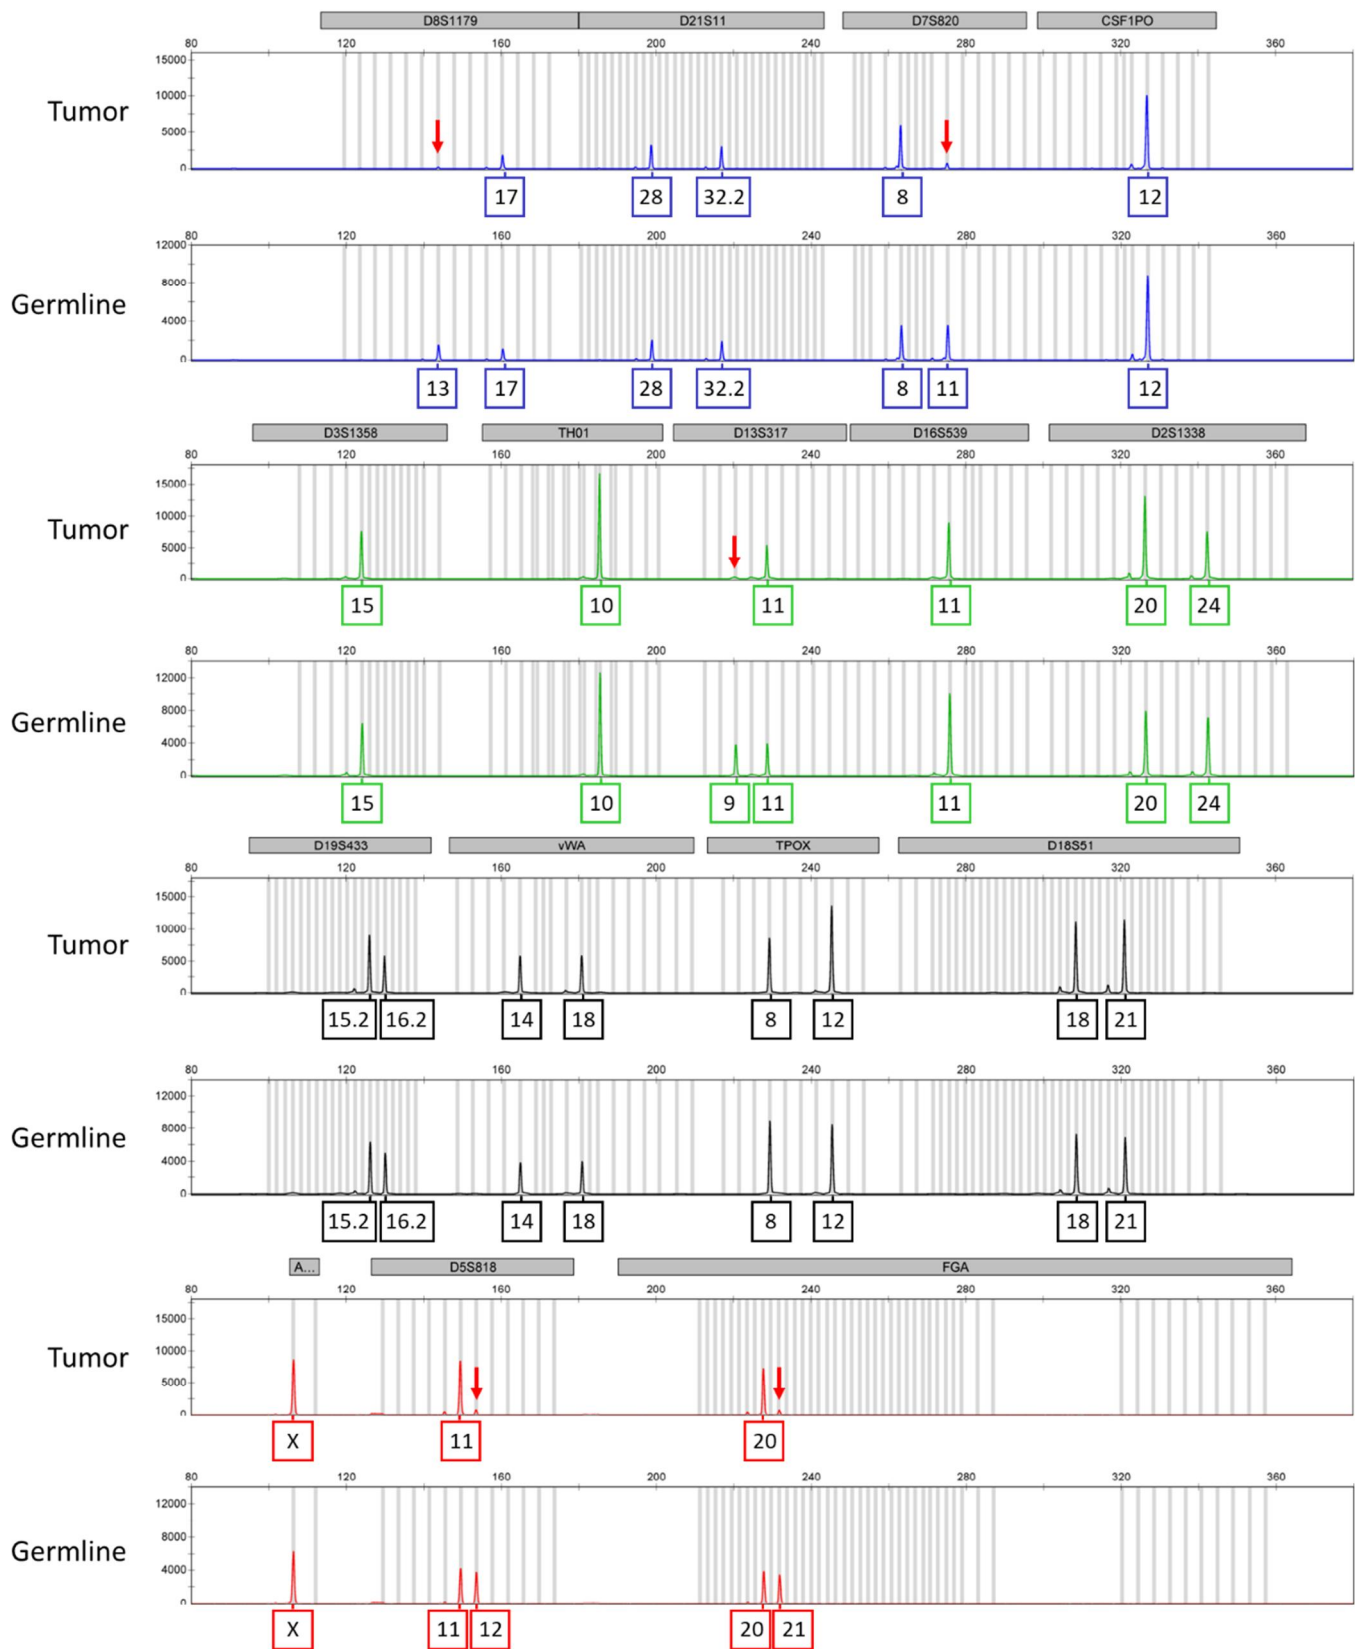

**Supplementary Figure S5. STR profiling for masked hypodiploidy.**

(a) VeriFiler™ and (b) Identifier™ Direct kit for tumor and germline DNA from patient 984 with masked hypodiploidy is represented. The imbalanced peaks detected in leukemia cells are indicated by red arrows.

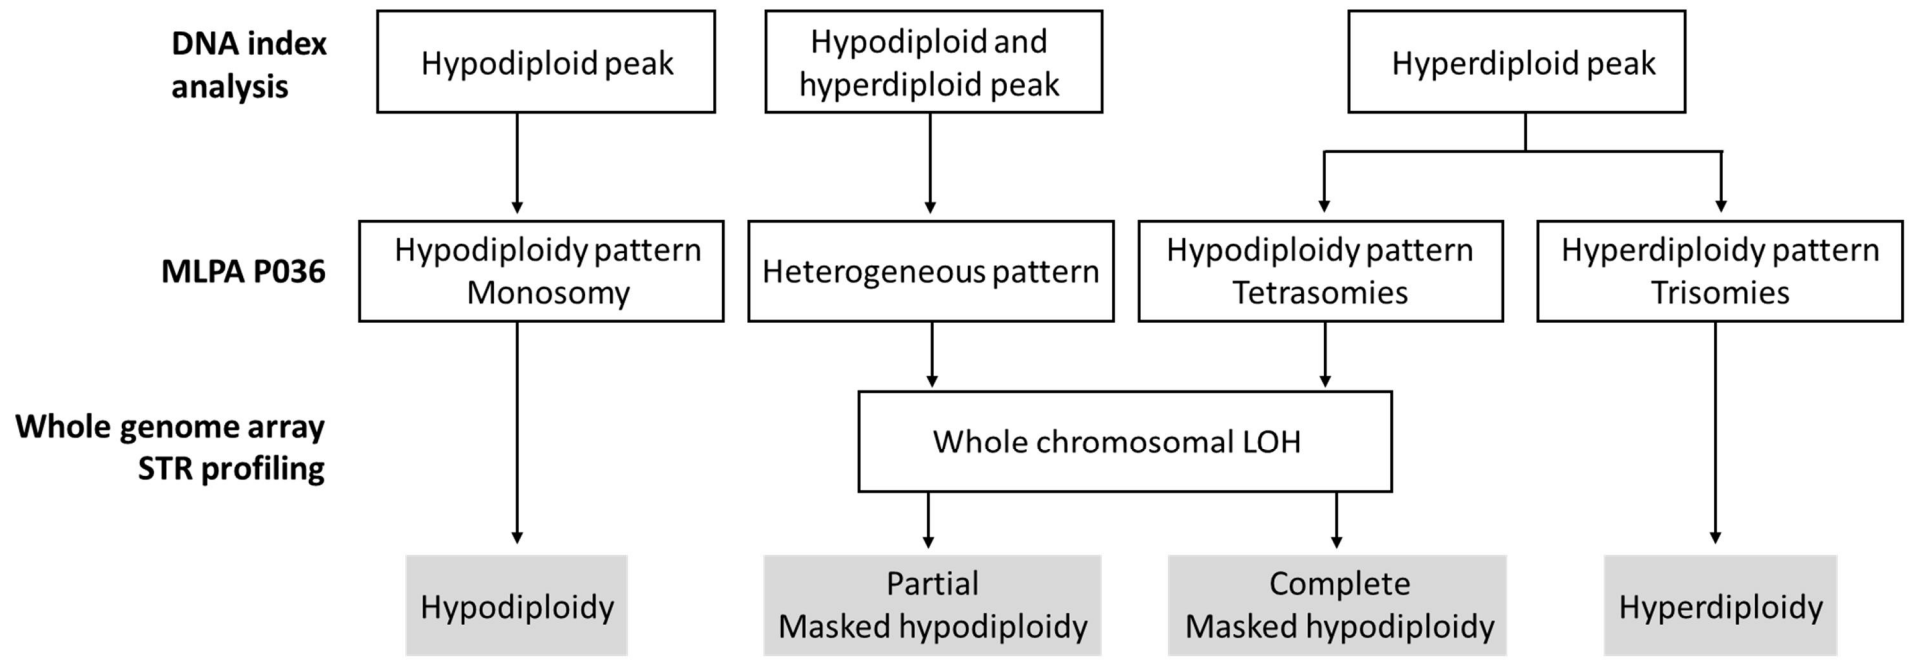

**Supplementary Figure S6. Flowchart for distinguishing masked hypodiploidy from high hyperdiploidy.**

(a)

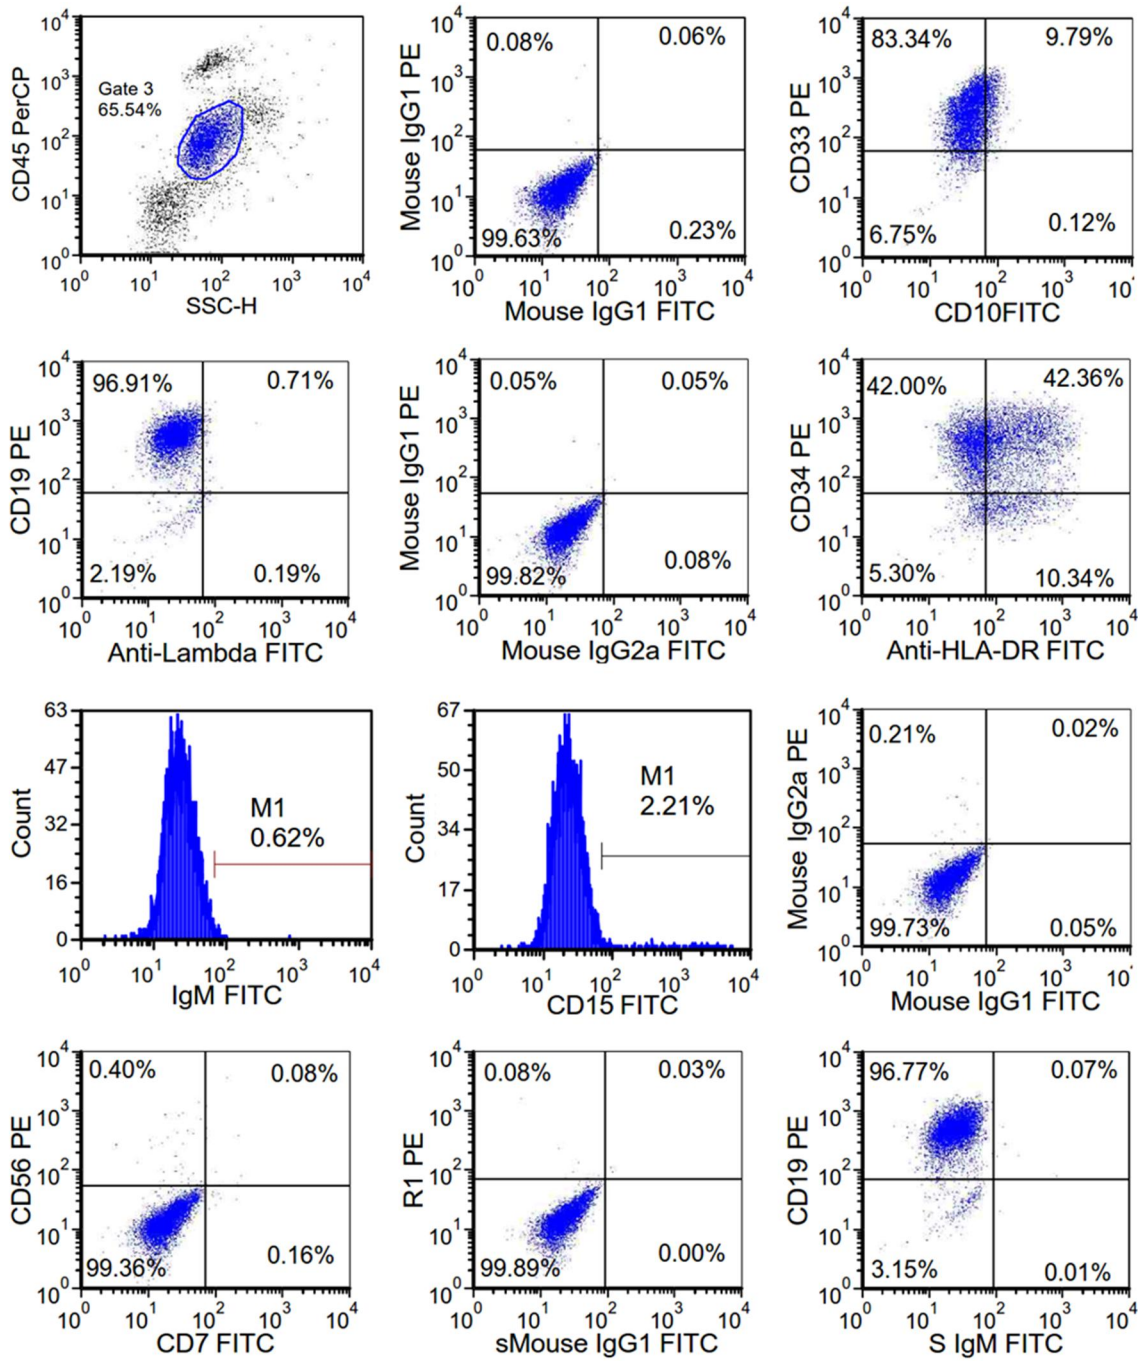

(b)

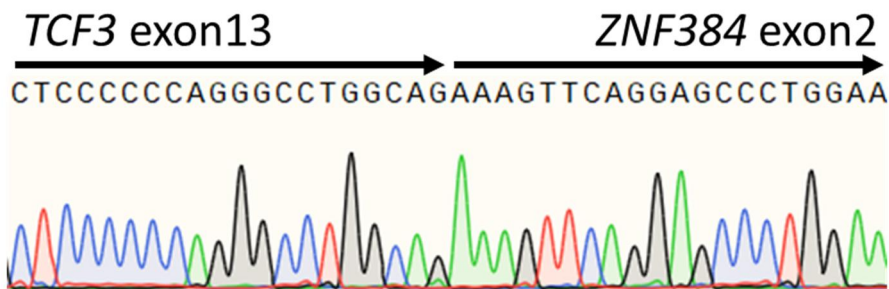

**Supplementary Figure S7. Analysis of a case with *TCF3-ZNF384* case.**

(a) The immunophenotype shows CD19+, CD10-, CD13+ and CD33+ B-cell ALL. (b) The *TCF3-ZNF384* fusion gene is confirmed by RT-PCR and Sanger sequencing.
